1 **Genetic Identification of a Common Collagen Disease in Puerto Ricans via**  
2 **Identity-by-Descent Mapping in a Health System**

3 G.M. Belbin<sup>1,2,3</sup>, J. Odgis<sup>2</sup>, E.P. Sorokin<sup>4</sup>, M-C. Yee<sup>5</sup>, S. Kohli<sup>1</sup>, B.S. Glicksberg<sup>2,3,6</sup>, C.R.  
4 Gignoux<sup>4</sup>, G.L. Wojcik<sup>4</sup>, T. Van Vleck<sup>1</sup>, J.M. Jeff<sup>1</sup>, M. Linderman<sup>2,3,†</sup>, C. Schurmann<sup>1</sup>, D.  
5 Ruderfer<sup>7,8,9,††</sup>, X. Cai<sup>2</sup>, A. Merkelson<sup>1</sup>, A.E. Justice<sup>10</sup>, K.L. Young<sup>10</sup>, M Graff<sup>10</sup>, K.E.  
6 North<sup>10</sup>, U. Peter<sup>11,12</sup>, R. James<sup>13</sup>, L. Hindorff<sup>14</sup>, R. Kornreich<sup>2</sup>, L. Edelmann<sup>2</sup>, O.  
7 Gottesman<sup>1,†††</sup>, E.E.A. Stahl<sup>1,3,6,7</sup>, J.H. Cho<sup>1,2,15</sup>, R.J.F. Loos<sup>1,16</sup>, E.P. Bottinger<sup>1††††</sup>,  
8 G.N. Nadkarni<sup>1</sup>, N. S. Abul-Husn<sup>1,2,3,†††</sup>, E.E. Kenny<sup>1,2,3,9\*</sup>

9  
10 <sup>1</sup> The Charles Bronfman Institute for Personalized Medicine, Icahn School of Medicine  
11 at Mount Sinai, New York, NY, USA.

12 <sup>2</sup> Department of Genetics and Genomics, Icahn School of Medicine at Mount Sinai, New  
13 York, NY, USA.

14 <sup>3</sup> The Icahn Institute of Genomics and Multiscale Biology, Icahn School of Medicine at  
15 Mount Sinai, New York, NY, USA.

16 <sup>4</sup> Department of Genetics, Stanford University School of Medicine, Stanford, CA

17 <sup>5</sup> Carnegie Institution for Science, Department of Plant Biology, Stanford, CA.

18 <sup>6</sup> Harris Center for Precision Wellness, Icahn School of Medicine at Mt Sinai, New York,  
19 NY, USA.

20 <sup>7</sup> Broad Institute, Cambridge, MA, USA.

21 <sup>8</sup> Division of Psychiatric Genomics, Icahn School of Medicine at Mt Sinai, New York, NY,  
22 USA.

23 <sup>9</sup> Center for Statistical Genetics, Icahn School of Medicine at Mt Sinai, New York, NY,  
24 USA.

25 <sup>10</sup> Department of Epidemiology, University of North Carolina at Chapel Hill, Chapel Hill,  
26 NC, USA

27 <sup>11</sup> Public Health Sciences Division, Fred Hutchinson Cancer Research Center, Seattle,  
28 WA, USA.

29 <sup>12</sup> Department of Epidemiology, University of Washington School of Public Health,  
30 Seattle, WA, USA

31 <sup>13</sup> National Institute on Minority Health and Health Disparities, National Institutes of  
32 Health, Bethesda, MD, USA

33 <sup>14</sup> National Human Genome Research Institute, National Institutes of Health, Bethesda,  
34 MD, USA

35 <sup>15</sup> Division of Gastroenterology, Icahn School of Medicine at Mount Sinai, New York, NY

36 <sup>16</sup> The Mindich Child Health and Development Institute, Icahn School of Medicine at  
37 Mount Sinai, New York, NY, USA.

38

39 † Present address: Department of Computer Science, Middlebury College, Middlebury,  
40 VT, USA

41 †† Present address: Departments of Medicine, Psychiatry and Biomedical Informatics,  
42 Vanderbilt Genetics Institute, Vanderbilt University Medical Center, Nashville, TN, USA

43 ††† Present address: Regeneron Pharmaceuticals, 777 Old Saw Mill River  
44 Rd, Tarrytown, NY, USA

45 †††† Present address: Berlin Institute of Health, Kapelle-Ufer 2, 10117 Berlin, Germany

46 \*Correspondence to: [eimear.kenny@mssm.edu](mailto:eimear.kenny@mssm.edu)

47

## 48 **Abstract**

49 Achieving confidence in the causality of a disease locus is a complex task that often  
50 requires supporting data from both statistical genetics and clinical genomics. Here we  
51 describe a combined approach to identify and characterize a genetic disorder that  
52 leverages distantly related patients in a health system and population-scale mapping.  
53 We utilize genomic data to uncover components of distant pedigrees, in the absence of  
54 recorded pedigree information, in the multi-ethnic BioMe biobank in New York City. By  
55 linking to medical records, we discover a locus associated with genetic relatedness that  
56 also underlies extreme short stature. We link the gene, *COL27A1*, with a little-known  
57 genetic disease, previously thought to be rare and recessive. We demonstrate that  
58 disease manifests in both heterozygotes and homozygotes, indicating a common  
59 collagen disorder impacting up to 2% of individuals of Puerto Rican ancestry, leading to  
60 a better understanding of the continuum of complex and Mendelian disease.

## 61 **Introduction**

62 During the past two decades major advances in deciphering the genetic basis of human  
63 disease have resulted in thousands of disorders that are now understood at a genetic  
64 level<sup>1,2</sup>. This progress has led to the integration of genomic sequencing in clinical care,  
65 especially for the diagnosis of rare genetic disease<sup>3,4</sup>, and clinical sequencing is  
66 increasingly offered to patients with known or suspected genetic disorders. In the past  
67 few years, large national and international efforts<sup>5-7</sup> have emerged to enable patients  
68 and health systems to share knowledge of rare genetic disorders and improve genetic  
69 testing, resulting in improved healthcare management and outcomes for patients. In

70 parallel, many large regional and national biobank efforts<sup>8–10</sup> are underway to enable  
71 the broad integration of genomics in health systems for genetic identification of  
72 disease<sup>11</sup>. Such efforts have recently revealed clinically actionable variants<sup>11,12</sup> and  
73 genetic disorders segregating at higher frequencies in general patient populations than  
74 previously suspected. The increased promulgation of genomics in health systems  
75 represents an opportunity to improve diagnostic sensitivity for more precise therapeutic  
76 intervention and better health outcomes<sup>13</sup>.

77 Despite this progress, most genetic diseases are still under-diagnosed<sup>14</sup> or  
78 misdiagnosed.<sup>15–17</sup> A number of barriers exist for wholesale genetic testing and  
79 diagnoses, including incomplete standardized guidelines for interpreting genetic  
80 evidence of disease<sup>18</sup>, variable penetrance or expressivity of phenotype<sup>19</sup>, and that the  
81 causal variant may be missed or mis-assigned during testing<sup>20</sup>. The latter is a  
82 particularly pernicious problem in non-European populations due to systematic biases in  
83 large genomic and clinical databases<sup>21,22</sup>. These challenges have led several research  
84 groups to attempt to genetically identify disease by examining patient health patterns  
85 using data from the Electronic Health Record (EHR)<sup>23,24</sup>. EHRs contain comprehensive  
86 information on medical care throughout a patient's life, including medications, medical  
87 billing codes, physician notes and generated reports (i.e. pathologic, genetic and  
88 radiologic reports). EHRs have been used to clinically characterize well-known genetic  
89 disorders, but have been of limited success for the vast cadre of less-characterized or  
90 unknown disorders<sup>25</sup>.

91 The gold standard of genetic disorder diagnosis involves testing both patient and family  
92 members to confirm Mendelian segregation of the suspected underlying pathogenic

93 variant<sup>26–28</sup>. However, as genomic data becomes more ubiquitous in health systems, it  
94 can be used to detect genetic relationships in the absence of known family and  
95 pedigree information. Specifically, components of pedigrees can be uncovered within  
96 the general population; particularly those that have experienced recent founder effects.  
97 Pairs of individuals who are related share genetic homology in the form of long genomic  
98 haplotypes. These haplotypes are considered to be identical-by-descent (IBD) if they  
99 are inherited from a common ancestor without any intervening recombination. The  
100 chance of any two people sharing a tract of their genome IBD decays exponentially,  
101 with a ~50% reduction in the chance of sharing per generation. However, when IBD  
102 sharing does occur, the length of an IBD segment can remain long even between  
103 distantly related individuals. In practice, long tracts of IBD (>3cM) can be accurately  
104 detected using genetic data between individuals with a common ancestor from the past  
105 4-50 generations<sup>29</sup>. Detection of IBD haplotypes can allow for the identification of  
106 distantly related patients with a genetic disorder driven by a locus inherited from a  
107 founding ancestor who brought the disease mutation into a population<sup>30–37</sup>. This is the  
108 principle underlying population-scale disease mapping approaches that combine IBD  
109 sharing and statistical association to discover novel disease loci, so called IBD-  
110 mapping.

111 By detecting genetic relatedness, as inferred by IBD sharing, we hypothesized that we  
112 may be able to detect hereditary forms of disease in an EHR-linked biobank. With over  
113 38000 participants, the BioMe biobank, at the Icahn School of Medicine at Mount Sinai,  
114 New York City (NYC), is one of the most diverse cohorts ascertained at a single urban  
115 medical center under a uniform study protocol. Participants are largely from the local

116 Upper East Side, Harlem and Bronx communities, and represent broad ancestral,  
117 ethnic, cultural, and socioeconomic diversity. We initially focused on adult height, which  
118 is easily measurable, stable over the adult life course, and one of the most abundantly  
119 recorded clinical parameters in EHRs. Height is known to be highly heritable and  
120 polygenic<sup>38,39</sup>, however, extremes of short stature can be caused by rare variants in  
121 single genes with large effect sizes<sup>40</sup>. Although, many genetic syndromes are known to  
122 cause short stature, most of the time no definitive etiology underlying short stature is  
123 found in patients. Here we used loci associated with genetic relatedness as measured  
124 by IBD to map a locus underlying extreme short stature in the BioMe biobank, and  
125 linked it to a known, but little characterized, collagen disorder previously thought to be  
126 rare. By interrogating a large global diversity panel, we demonstrated that this variant is  
127 actually common in Puerto Rican populations. Furthermore, we leveraged the EHR to  
128 show significant musculoskeletal disease in both heterozygous and homozygous  
129 patients, indicating the disease is not simply a recessive disorder as had previously  
130 been thought. Finally, we showed how this work can generate broad insights for  
131 sustainable adoption and large-scale dissemination of genomic medicine.

## 132 **Results**

### 133 *Detecting Patterns of Diversity, Founder Effects and Relatedness in the BioMe Biobank* 134 *from New York City*

135 The BioMe biobank comprises a highly diverse cohort, with over 65% of participants  
136 self-reporting as Black/African-American or Hispanic/Latino, and over 35% born outside  
137 mainland US, representing more than 110 countries of origin. First we estimated

138 patterns of direct relatedness in a subset of BioMe participants genotyped on the  
139 Illumina OmniExpress array (N=11212) by detecting pairwise identity-by-state using  
140 RELATEAdmix<sup>41</sup>, a method that accounts for admixture in populations (**Figure 1- figure**  
141 **supplement 1**). We observed that 701 individuals had primary (parent-child, sibling) or  
142 secondary (avuncular, grandparental) relationship with another participant in BioMe,  
143 and we removed these individuals from all downstream analysis. Next we devised a  
144 strategy to divide the diverse BioMe biobank into population groups for downstream  
145 analysis. We combined genotype data for BioMe participants (N=10511) with 26 global  
146 populations from the 1000 Genomes project (N=2504)<sup>42</sup> and two additional panels of  
147 Native American (N=43)<sup>43</sup> and Ashkenazi Jewish populations (N=100) (see Methods).  
148 Using a common set of 174468 SNPS we performed principal component analysis<sup>44</sup>  
149 (PCA; **Figure 1 – figure supplement 2**). Based on both self-reporting and patterns of  
150 genetic diversity observed in BioMe participants, we stratified individuals into four broad  
151 population groups. The first group self-reported as European American, but were also  
152 genetically identified as Ashkenazi Jewish (AJ; N=808) as they clustered distinctly with  
153 an AJ reference panel and separately from other European ancestry groups in PCA  
154 space (**Figure 1- figure supplement 3**). The other three groups we defined using self-  
155 reported race/ethnicity categories, African-American (AA; N=3080), Hispanic/Latino  
156 (H/L; N=5102) and European-Americans with no AJ genetic ancestry (Non-AJ EA;  
157 N=1270) (**Figure 1- figure supplement 3**). An additional 251 individuals who reported  
158 ‘Mixed’ (N=89) or ‘Other’ (N=162) ethnicity were excluded from further analysis.

159 To evaluate signatures of distant relatedness BioMe biobank participants, we estimated  
160 sharing of genomic tracts IBD >3cM between every pair of individuals using the



161 GERMLINE software<sup>45</sup>. The minimum length of 3cM was chosen based on reports of  
162 elevated type I error in call rates of smaller lengths<sup>46,47</sup>. It is known that population-level  
163 rates of distant relatedness are observed to be particularly elevated after population  
164 bottlenecks (*i.e.* in founder populations)<sup>48</sup>. We summed the length of all IBD-tracts  
165 shared between a given pair of individuals if they shared more than one tract and  
166 examined the distribution of pairwise sharing at a population level. We observed  
167 elevated levels of distant relatedness in both the AJ (median summed length of IBD  
168 sharing within population=44.7cM; 95% C.I. = 44.66-44.82cM) and HL (16.2cM; 16.18-  
169 16.22cM) populations, compared to AA (3.77cM; 3.76-3.77cM) or non-AJ EA (4.5cM;  
170 4.45-4.55cM) populations (Figure 1A). This is congruent with previous reports of  
171 founder effects in both AJ populations<sup>49</sup> and in some H/L populations<sup>50</sup>.

172 Hispanic or Latina is a broad ethnic label encompassing myriad populations with origins  
173 in Northern, Southern or Central America, century-long roots in New York City, and  
174 genetic ancestry from Africa, Europe and the Americas. To explore the signature of a  
175 founder effect in the BioMe H/L population, we leveraged self-reported and genetic  
176 information about sub-continental ancestry. By self-reporting, the H/L participants in  
177 BioMe were born in New York City (NYC) (40%), Puerto Rico (24%), Dominican  
178 Republic (19%), Central/South America (12%), Mexico (2%) or other Caribbean Island  
179 (2%) (**Figure 1B**). We examined IBD tract length distributions within H/L sub-  
180 continental populations and observed that the founder effect was predominantly driven  
181 in the Puerto Rican-born group (**Figure 1C**). We assembled a cohort of Puerto Ricans  
182 including BioMe participants who were either born in Puerto Rico or, were born in NYC  
183 and had 2 parents or 3-4 grand parents who were born in Puerto Rico (N=1245).

184 Approximately 5086 NYC-born H/L individuals did not have recorded parental or  
185 grandparental country-of-origin, therefore we also devised a selection strategy using  
186 PCA analysis. We identified BioMe H/L participants on the cline between the African  
187 and European reference panels in PCA space coincident with Puerto Rican-born  
188 individuals. We excluded those on the same cline with ancestry from the Dominican  
189 Republic or another Caribbean Island (**Figure 1 – figure supplement 4**), and counted  
190 the remainder (N=1571) in the Puerto Rican group. In total, we estimated 2816 H/L in  
191 the BioMe discovery cohort were of Puerto Rican ancestry, and focused the  
192 downstream analysis on this group as the largest founder population in BioMe.

193 *Detecting a Locus Shared Identical-by-Descent Underlying Extreme Short Stature in*  
194 *Puerto Ricans*

195 Next we tested the hypothesis that rare, recessive disease variants may have arisen to  
196 appreciable frequency in the Puerto Rican founder population. We linked genomic data  
197 to clinical data in the Electronic Health Record (EHR) of the Mount Sinai Health System.  
198 We focused on height, a stable and ubiquitous health measure. Clinically, rare  
199 instances of growth failure or ‘short stature’ may be caused by a large heterogeneous  
200 group of genetic disorders (i.e. skeletal dysplasias)<sup>51</sup>. We first extracted measures of  
201 height for the Puerto Rican adult population of BioMe (mean age=55.3, standard  
202 deviation (s.d.)=16.1). After making exclusions based on age ( $\geq 18$  years old for  
203 women,  $\geq 22$  years old for men, and  $< 80$  years old in both sexes), mean height  
204 measurements (mean height=5’ 8.2”, s.d.=3.2” for men; mean height=5’ 2.8” s.d.=2.8”  
205 for women) were consistent with those reported for Puerto Rican populations in a recent  
206 global study on height<sup>52</sup>. We noted that 56 Puerto Ricans met the clinical definition of

207 short stature<sup>53</sup> (range of short stature 5'1"-4'0" in men, and 4'8"-3'8" in women) defined  
208 as 2 standard deviations below the population-specific mean for men and women  
209 separately (**Figure 2 – figure supplement 1**).

210 To test for recently arisen, recessive variants underlying clinical short stature in Puerto  
211 Ricans, we implemented a previously published pipeline for 'IBD mapping'<sup>31,54</sup> (**Figure 2**  
212 **– figure supplement 2**). We first clustered participants into 'cliques' of 3 or more  
213 individuals whom, at a given genomic region, shared overlapping homologous IBD  
214 tracts of at least 0.5cM in length. Membership in a clique indicates the sharing of a  
215 recent common ancestor at that locus, from which the homologous IBD tract was jointly  
216 inherited. Clustering of IBD into cliques in the Puerto Rican population (N=2816)  
217 yielded 1434421 IBD-cliques after quality control filters (see methods). The site  
218 frequency spectrum of IBD-cliques (**Figure 2 – figure supplement 3**) demonstrates an  
219 expected exponential distribution of clique sizes (of 3-77 haplotypes), representing a  
220 class of rare IBD haplotypic alleles (allelic frequency 0.0005-0.0137). To test whether  
221 any cliques of IBD haplotypes were significantly associated with height we performed  
222 genome-wide association of height as a continuous trait under a recessive model using  
223 PLINKv1.9<sup>55,56</sup>, including the first five PCA eigenvectors as covariates (see Methods).  
224 We restricted analysis to homozygous IBD-haplotypes that were observed among at  
225 least 3 individuals (480 cliques in total). Adjusting for 480 tests (Bonferonni adjusted  
226 threshold  $p < 1 \times 10^{-4}$ ) one IBD-clique achieved a genome-wide significant signal at the  
227 locus 9q32 (IBD-clique frequency=0.012;  $\beta = -3.78$ ;  $p < 2.57 \times 10^{-11}$ ) (**Figure 3A**), spanning  
228 a large mapping interval chr9:112MB-120MB. The clique contains 59 individuals, 56 of  
229 whom are heterozygous and 3 are homozygous for the associated IBD haplotype.

230 *Fine-mapping Short Stature Locus Reveals Putative Link to Mendelian Syndrome*

231 The three individuals driving the recessive signal, two women and one man, were less  
232 than 2.5 s.d. shorter (height reduction range 6"-10") than the population mean for height  
233 in the Puerto Rican cohort (**Figure 3B**). The IBD-haplotypes driving the signal spanned  
234 a genic region with several candidate loci, and the minimum shared boundary  
235 overlapped a single gene, *COL27A1*, which encodes for Collagen Type XXVII, Alpha 1  
236 (**Figure 3C**). We performed whole genome sequencing (WGS) of the three homozygous  
237 individuals, and an additional short-statured individual that we observed to possess a  
238 homozygous IBD haplotype that was both directly upstream of and highly correlated  
239 with the top IBD-clique. Individuals were sequenced to a depth of 4-18X coverage  
240 (**Supplementary file 1**). Examination of variants that were observed in at least 6 copies  
241 between the four individuals revealed a single candidate coding allele, a missense  
242 mutation in Collagen Type XXVII, Alpha 1 (*COL27A1*, g.9:116958257.C>G,  
243 NM\_032888.1, p.G697R, rs140950220) (**Supplemental file 2**). *In silico* analysis  
244 suggest that this glycine residue is highly conserved, and that a molecular alteration to  
245 arginine at this position is predicted to be damaging (SIFT score=0.0; PhyloP  
246 score=2.673; GERP NR score=5.67). These findings are consistent with a recent report  
247 implicating the same *COL27A1* variant as causal for the rare orthopedic condition Steel  
248 syndrome in a Puerto Rican family<sup>57</sup>. First described in 1993, the main clinical features  
249 of Steel syndrome include short stature, bilateral hip and radial head dislocations, carpal  
250 coalition (fusion of the carpal bones), scoliosis, *pes cavus* (high arches), and  
251 dysmorphic features<sup>58</sup>.

252 To confirm the link between the IBD haplotype and the putative causal variant, we  
253 calculated the concordance between the IBD haplotype and carrier status of the  
254 *COL27A1.pG697R* variant by genotyping all of the homozygotes and carriers of the top  
255 IBD-clique in the recessive model (N=59), along with a panel of age- and sex-matched  
256 controls (N=59). This demonstrated 100% concordance between the *COL27A1.pG697R*  
257 variant and the significant IBD-haplotype in homozygotes (**Supplementary file 3**). We  
258 note that two Puerto Rican participants in the phase 3 1000 Genomes Project reference  
259 panel (1KGP) were carriers of the *COL27A1.pG697R* variant, raising the possibility that  
260 we may have been able to detect this association using more a traditional SNP  
261 association approach. Therefore, we performed genome-wide association in the same  
262 Puerto Rican cohort (N=2622) by first imputing the 1KGP panel and re-running the  
263 recessive test as described above (n=10007795 imputed and genotyped SNPs with an  
264 INFO score of > 0.3 and at least two observations of homozygotes). The recessive  
265 model appeared to be well calibrated ( $\lambda=1.02$ ), however, we observed no genome-wide  
266 significant signal (**Figure 2 - figure supplement 4**). Association with the  
267 *COL27A1.pG697R* variant was the 11775th most significant association (MAF=0.014:  
268  $\beta=-3.0$ ;  $p<0.001$ ). Upon examination of the correlation between the imputed  
269 *COL27A1.pG697R* and the true carrier status of homozygotes, we noted a concordance  
270 of only 66.67%, indicating that the IBD haplotype was a better tag of the true  
271 *COL27A1.pG697R* homozygous state compared to 1KGP imputation in the Puerto  
272 Rican cohort (**Supplemental file 3**).

273

274 The association between *COL27A1.pG697R* and clinical short stature was replicated  
275 using an independent cohort of 1775 individuals, from BioMe, of self-reported Puerto

276 Rican ancestry, that were genotyped on the Illumina Infinium Multi-Ethnic Genotype  
277 Array (MEGA) as part of the Polygenic Architecture using Genomics and Epidemiology  
278 (PAGE) Study. The *COL27A1*.pG697R (rs140950220) variant was directly genotyped  
279 on MEGA, and an association of the variant under a recessive model resulted in a  
280 strong signal of association (allele frequency=0.017;  $\beta$ =-3.5; s.e.=0.70;  $p<4.87\times 10^{-07}$ ).  
281 The replication analysis revealed 51 additional BioMe carriers and two individuals that  
282 were homozygous for the variant. Both carrier and affected status was confirmed *via*  
283 independent genotyping and Sanger sequencing (see Methods). The two homozygous  
284 participants were both short statured (2.4 and 3.6 s.d from the sex specific population  
285 mean).

286

### 287 *Evidence from Electronic Health Records Supports Suspected Cases of Steel* 288 *Syndrome*

289 To determine whether there was any clinical evidence to validate the link between the  
290 *COL27A1*.pG697R variant and Steel syndrome, a clinical expert manually reviewed the  
291 electronic health records (EHR), including clinical diagnoses, surgical procedures, and  
292 radiology reports, of the five participants (3 women, 2 men, age range 34-74 years)  
293 homozygous for the *COL27A1*.pG697R variant. Of note, there was no evidence that any  
294 of the five patients had a clinical diagnosis of Steel syndrome. In all five individuals,  
295 however, we found EHR-documented evidence of several previously described Steel  
296 syndrome characteristics, including developmental dysplasia of the hip (or congenital  
297 hip dysplasia), carpal coalition, scoliosis, and cervical spine anomalies (**Table 1**)<sup>58,59</sup>.  
298 The incidence of cervical spine anomalies, including cord compression and spine

299 surgeries, was higher than previously reported (four out of five patients). There was also  
300 evidence of other significant musculoskeletal complications, including lumbar and  
301 thoracic spine anomalies in three patients, knee replacements in two patients (both  
302 under age 50), and joint degeneration or arthritis in four patients. Together, these data  
303 help further our understanding of Steel syndrome-associated characteristics and  
304 potential complications that can occur later in life.

### 305 *Functional Investigation of COL27A1.pG697R*

306 To understand the biological mechanism underlying Steel syndrome, we investigated  
307 the functional role of the *COL27A1* gene. *COL27A1* is a fibrillar collagen, which are a  
308 class of collagens that contribute to the structural integrity of the extracellular matrix<sup>60</sup>.  
309 Enrichment of *COL27A1* RNA expression in vertebrae, as well as long bones, eyes, and  
310 lungs has previously been observed in embryonic mice<sup>60</sup>. A mouse deletion of 87 amino  
311 acids of the *COL27A1* homolog exhibited severe chondroplasia consistent with clinical  
312 features observed in homozygotes<sup>61</sup>, a similar musculoskeletal phenotype was  
313 observed in knockdown of the *col27a1a* and *col27a1b* genes in zebrafish<sup>62</sup>. Type alpha-  
314 1 collagen genes, of which *COL27A1* is a member, contain a conserved Gly-Xaa-Yaa  
315 repeat in their triple helical domain<sup>63</sup>. Therefore, we hypothesized that the  
316 *COL27A1.pG697R* variant may similarly disrupt stability of the *COL27A1* triple helix.

317 To test this hypothesis we modeled the effect of a glycine-to-arginine substitution in the  
318 structure of a prototypical collagen peptide<sup>64</sup>. We observed that the glycine residues  
319 occupied the center of the crowded triple helix, and that substitution for a bulkier  
320 arginine would likely destabilize helix formation through steric hindrance (**Figure 2 –**

321 **figure supplement 5**). These data provide support for a functional model of the  
322 pathogenicity of *COL27A1.G697R* through destabilization of the triple helix, which may  
323 occur within developing spinal chords, long bones, and other tissues, resulting in the  
324 observed clinical features in homozygotes. We note that many other collagen disorders,  
325 including Ehlers-Danlos syndrome<sup>65-67</sup>, Alport syndrome<sup>68,69</sup> and Osteogenesis  
326 Imperfecta<sup>70,71</sup>, are driven by molecular alterations of a glycine in the triple helix of the  
327 underlying collagen genes. However, all of these disorders are inherited under an  
328 autosomal dominant mode, in contrast to Steel syndrome, which has only been reported  
329 as a recessive disease. This analysis raises the question of whether some and/or milder  
330 clinical features of Steel syndrome may be present in carriers.

331 *Assessing the Health Records of COL27A1.pG697R Carriers Reveals Evidence of*  
332 *Musculoskeletal Disease*

333 To test for clinical features of Steel syndrome in *COL27A1.pG697R* carriers, we  
334 performed two analyses using EHR data. The first was a test for associated medical  
335 billing codes (ICD9s) with *COL27A1.pG697R* carrier status, or Phenome-Wide  
336 Association Study (PheWAS)<sup>72,73</sup>. PheWAS analysis is often performed using a general  
337 linear model (GLM), however standard implementations often do not account for  
338 scenarios where there is a large imbalance between per-test number of cases and  
339 controls, rare variants/ICD9s or the presence of elevated distant relatedness. Therefore,  
340 in addition to the GLM, we also ran three other score based tests; (i) that use  
341 saddlepoint approximation (SPATest)<sup>74</sup> to account for case:control imbalance; (ii) a  
342 linear mixed model (GCTA)<sup>75</sup> to account for distant relatedness; and (iii) a test that



343 incorporates a bias-reduction for small numbers of observations (Firth test)<sup>76</sup>. Each test  
344 was run using ICD9 codes in all individuals of Puerto Rican ancestry (N=106  
345 *COL27A1.pG697R* carriers and N=4480 non-carriers). The ICD9 code was set as the  
346 outcome variable and *COL27A1.pG697R* as the primary predictor variable, including  
347 age, sex and the first five PCAs as covariates in all tests. To avoid spurious  
348 associations, we restricted the analysis to diagnosis codes with at least 3 observations  
349 (n=367 ICD9 codes) amongst carriers.

350 Results of the GLM test are shown in **Figure 3** and **Table 2**. Of the five significantly  
351 associated ICD9 codes (False Discovery Rate (FDR)<0.05), three involved the  
352 musculoskeletal system 730.08 ( $p_{\text{GLM}} < 7.1 \times 10^{-6}$ ; odds ratio (OR)=34.5; 95% Confidence  
353 Interval (CI)=7.4-162), 721.0 ( $p_{\text{GLM}} < 6.6 \times 10^{-5}$ ; OR=5.4; CI=2.4-12.3), and 716.98  
354 ( $p_{\text{GLM}} < 4.4 \times 10^{-4}$ ; OR=5.8; CI=2.2-15.3). ICD9 730.08 encodes for “acute osteomyelitis,  
355 other specified sites”. Manual review of chart records for these patients revealed that  
356 this code referred to vertebral osteomyelitis in the three carriers with the ICD9 code.  
357 ICD9 721.0 encodes for cervical spondylosis without myelopathy. Cervical spondylosis  
358 refers to degenerative changes of the cervical spine, which can eventually progress to  
359 encroach on the cervical canal, causing myelopathy (spinal cord injury). A third  
360 diagnosis code, 716.98, encodes for “arthropathy, unspecified, or involving other  
361 specified sites”. Manual review of chart records for these patients revealed that this  
362 code referred to knee arthropathy in all four patients. Finally, two other ICD9 codes  
363 were significantly associated with the *COL27A1.pG697R* variant; 622.10 ( $p_{\text{GLM}} < 1 \times 10^{-4}$ ;  
364 OR=5.4; CI=2.3-12.6), which encodes for cervical dysplasia, and 789.1 ( $p_{\text{GLM}} < 2.1 \times 10^{-4}$ ;  
365 OR=11.6; CI=3.2-42.2), which encodes for hepatomegaly. Presently, it is unclear

366 whether these two are related to a *COL27A1*.pG697R carrier phenotype, or are  
367 spurious associations.

368 We observed over inflation in the distribution of the PheWAS test statistic, measured by  
369 lambda ( $\lambda$ ), for all four score based models ( $\lambda_{\text{GLM}}=1.59$ ;  $\lambda_{\text{SPATest}}=1.20$ ;  $\lambda_{\text{GCTA}}=1.36$ ;  
370  $\lambda_{\text{Firth}}=2.09$ ), indicating that no single model fully accounts for the confounding effects of  
371 distant relatedness, case:control imbalance and rare variants/ICD9s (**Figure 3 – figure**  
372 **supplement 1**). The code linked to vertebral osteomyelitis (730.08) was the top signal  
373 in all tests ( $p_{\text{SPATest}} < 1.4 \times 10^{-4}$ ;  $p_{\text{GCTA}} < 7.9 \times 10^{-10}$ ;  $p_{\text{Firth}} < 1.5 \times 10^{-9}$ ), but only remains  
374 significant after genomic control adjustment in one of the tests ( $p_{\text{GCTA\_adjusted}} < 4.6 \times 10^{-5}$ ).  
375 Neither codes linked to cervical spondylosis (721.0;  $p_{\text{SPATest}} < 3.0 \times 10^{-3}$  (rank=3<sup>rd</sup>);  
376  $p_{\text{GCTA}} < 3.3 \times 10^{-3}$  (8<sup>th</sup>)) or knee arthropathy (716.98;  $p_{\text{SPATest}} < 0.022$  (21<sup>st</sup>);  $p_{\text{GCTA}} < 3.5 \times 10^{-3}$   
377 (9<sup>th</sup>);  $p_{\text{Firth}} < 0.001$  (35<sup>th</sup>))) were significant after genomic control correction. Therefore,  
378 while PheWAS analysis provided preliminary support of Steel syndrome-associated  
379 clinical features in carriers, best practices for PheWAS models for rare variants/ICD9  
380 codes, and in the presence of population structure, remains an open problem for the  
381 genomics community. It is also possible that some relevant clinical features of Steel  
382 syndrome might be poorly captured by or absent from medical billing codes.

383 To evaluate the preliminary evidence from the PheWAS analysis, we performed a  
384 second analysis of EHR data that focused on a comprehensive manual chart review to  
385 examine for evidence of Steel syndrome characteristics in the *COL27A1*.pG697R  
386 carriers in the same manner as performed for homozygotes. We limited the analysis to  
387 carriers below the age of 55 (N=34; mean age 41.8 years) to reduce confounding from

388 age-related related symptoms of spine and joint pain. We also selected 31 age and sex  
389 matched Puerto Rican non-carriers for comparison (mean age 40.6 years). Utilizing the  
390 same criteria used to characterize Steel syndrome cases, we found no evidence of  
391 clinical short stature or hip dislocation in carriers, but did observe a trend of elevated  
392 rates of major joint and spine degradation (**Table 1**). In general, 38% (13/34) of carriers  
393 showed evidence of spine degeneration varied from severe (multiple level cord  
394 compression and neurological symptoms necessitating corrective surgery) to moderate  
395 (lower back pain with no neurological symptoms managed with physical therapy and/or  
396 pain medication) compared to 13% (4/31) of non-carriers (Fishers exact test  $p < 0.03$ ).  
397 Specifically, we found an increased risk of cervical stenosis in 15% (5/34) of carriers  
398 compared to 0% (0/31) of controls ( $p < 0.05$ ). Although not reaching statistically  
399 significance, we show a trend of 2-fold higher rates of scoliosis (24%;  $p < 0.35$ ), arthritis  
400 (38%;  $p < 0.1$ ), and lumbar spine degradation (29%;  $p < 0.25$ ) in carriers compared to non-  
401 carriers and previous published reports in similar age groups<sup>77,78</sup>. Together these data  
402 suggest an appreciable burden of joint and spine degradation in *COL27A1.pG697R*  
403 carriers (**Table 1**).

#### 404 *Worldwide Frequency and Demographic History of COL27A1.pG697R*

405 Having genetically identified and clinically characterized a previously little-known  
406 disease variant, we next investigated which populations were at risk for harboring the  
407 allele. We assessed the carrier frequencies of the *COL27A1.pG697R* variant in global  
408 panel of 51745 individuals from Africa (N=376), the Americas (N=45685), Asia  
409 (N=5311), Europe (N=209), the Middle East (N=163) and Oceania (N=28) genotyped on

410 MEGA in the PAGE Study. This included; 13050 in the Multi-Ethnic Cohort (MEC)<sup>79</sup>  
411 Study; 12327 in the Hispanic Community Health Study/Study of Latinos (HCHS/SOL)<sup>80</sup>;  
412 12852 in the Women's Health Initiative (WHI) Study<sup>81</sup>; 13044 additional BioMe biobank  
413 participants (including the 1775 Puerto Ricans on MEGA described above); and a  
414 Global Reference Panel from Stanford University including the Human Genome  
415 Diversity Panel<sup>82</sup> (N=986, see Methods). Combined, the PAGE and BioMe dataset  
416 represented 57316 individuals from 112 global populations (**Supplementary file 4**). The  
417 *COL27A1*.pG697R C allele was present in 183 copies (173 heterozygous carriers and 5  
418 homozygous cases). We estimate the carrier rate of *COL27A1*.G697R to be 1:51 in  
419 Puerto Rican-born individuals (minor allele frequency (MAF)=1.1%); 1:9 in individuals  
420 born on the island of St. Thomas (MAF=11%); 1:346 in Hispanic/Latinos in the US  
421 (MAF=0.29%) and 1:72 in BioMe Hispanic/Latino populations from New York City  
422 (MAF=0.7%); and 1:746 in individuals born in the Dominican Republic (MAF=0.067%)  
423 (**Figure 4A**). We note that only 9 people were assayed from St. Thomas, so the high  
424 carrier frequency estimate could be biased by small sample size. Finally, the variant is  
425 present in only 4 copies in the 60,706 exomes in the ExAC database<sup>83</sup>, likely due to  
426 differences in the populations comprising both datasets.

427 To predict what other populations might be at risk for Steel syndrome, we explored the  
428 locus-specific demographic history in carriers of the *COL27A1*.pG697R risk haplotype.  
429 First, by visual inspection, we were able to discriminate a single haplotype of 107.5kb in  
430 length that contained 55 SNPs, which uniquely tagged the *COL27A1*.pG697R variant  
431 ( $R^2=1$ ). This haplotype was present only in individuals born in Puerto Rico (N=25), the  
432 Dominican Republic, (N=2), Columbia (N=1), New York City (N=40) and St. Thomas

433 (N=1). Genotyping determined that only the haplotype carriers from Puerto Rico, New  
434 York City and St. Thomas also carried the *COL27A1*.pG697R variant (N=56 in total).  
435 Second, we inferred continental ancestry along the genomes of the three Puerto Rican  
436 homozygotes in the discovery cohort. Local ancestry inference is the task of assigning  
437 continental ancestry to genomic segments in an individual with recent ancestors from  
438 multiple continents. For the Puerto Rican homozygotes, we estimated local haplotypic  
439 similarity with a reference panel of African, European and Native American genomes  
440 using RFMix<sup>84</sup>. Examination of local ancestry on the background of the IBD haplotype in  
441 all three homozygous individuals revealed all to be homozygous for Native American  
442 ancestry, suggesting the *COL27A1*.pG697R arose on a Native American haplotype  
443 **(Figure 4B)**.

444 To test whether the disease variant arose via genetic drift or selection, we used the  
445 IBDNe software<sup>85</sup> to estimate the historical effective population size ( $N_e$ ) of the Puerto  
446 Rican discovery cohort (N=2816) **(Figure 4C)**. The IBDNe software calculates the  
447 effective population size of a given population over past generations by modeling the  
448 distribution of IBD tract lengths present in the contemporary population. The analysis  
449 suggested evidence of a strong bottleneck in Puerto Ricans approximately 9-14  
450 generations ago, with the smallest effective population sized dating approximately 12  
451 generations ago (estimated  $N_e$ =2580, 95% C.I 2320-2910). This is consistent with the  
452 timing of European immigration and slave trading on the Island, resulting in admixture  
453 and population bottlenecking, followed by demographic growth post-contact<sup>50,86</sup>. Finally,  
454 to see if there was evidence that the locus had undergone a recent selective sweep we  
455 calculated the integrated haplotype score (iHS)<sup>87,88</sup> across chromosome 9 in phased

456 genotype data for BioMe Puerto Rican samples, but did not observe evidence of  
457 selection at the locus (**Figure 4 – figure supplement 1**). Together, this evidence  
458 suggests that the *COL27A1*.pG697R variant arose in the ancestral Native American  
459 populations that peopled the Caribbean, which underwent a strong bottleneck during the  
460 period of colonization, which may help explain the prevalence of this disease in  
461 amongst contemporary Puerto Rican populations.

## 462 **Discussion**

463 Here we describe a new approach to utilize genomic data in health systems for  
464 identifying and characterizing genetic disorders, the cornerstone of which is the ability to  
465 identify related individuals in the absence of recorded pedigree or genealogy  
466 information. By linking medical records of distantly related patients, identified by shared  
467 tracts of genetic homology identical-by-descent (IBD), we discovered a recessive  
468 haplotype on 9q32 conferring extreme short stature. Whole genome sequencing  
469 revealed that a mutation (Gly697Arg) in the *COL27A1* gene had been previously  
470 implicated as the genetic variant underlying Steel syndrome<sup>57–59</sup>. Population screening  
471 indicated that the disease variant is more common than previously thought in people  
472 with Puerto Rican ancestry, and in some other Caribbean populations, and very rare or  
473 absent elsewhere in the world. Extensive analysis of clinical records confirms almost all  
474 features of the recessive disorder in cases, and reveals potential complications that can  
475 occur later in life. An agnostic survey of the medical records of carriers, supplemented  
476 by manual chart review, indicates evidence of joint and spine degradation in  
477 heterozygotes. Biochemical modeling suggests that *COL27A1*.G697R disrupts a

478 conserved triple helix domain of the alpha-1 collagen in a mechanism similar to  
479 dominant forms of other collagen disorders<sup>63</sup>. Taken together, this study indicates that a  
480 single mutation in the *COL27A1* gene underlies a common collagen disorder impacting  
481 up to 2% of people of Puerto Rican ancestry.

482 This is consistent with our finding, supported by previous work<sup>50</sup>, demonstrating a  
483 founder effect in Puerto Rican populations. Despite segregating at an estimated carrier  
484 rate of 1:51, the *COL27A1.pG697R* variant was first described very recently<sup>57</sup>. This  
485 suggests that there may be other highly penetrant disease variants segregating at  
486 appreciable frequencies in Puerto Rican populations<sup>89-94</sup>, and other understudied  
487 founder populations, the discovery of which could lead to new disease variants and  
488 biology. Indeed, although *COL27A1* was first implicated as the Steel syndrome disease  
489 locus in an extended family from Puerto Rico recently<sup>56</sup>, other variants in *COL27A1*  
490 have since been linked to Steel syndrome in Indian<sup>95</sup> and Emerati<sup>96</sup> families revealing  
491 additional clinical features of the disease such as hearing loss. In our own health  
492 system, approximately 190,000 patients of Puerto Rican descent are treated annually<sup>97</sup>.  
493 We estimate that up to 80 may have the severe homozygous form of the disorder and  
494 that the milder heterozygous form could be found in up to 1200 patients. A search of  
495 progress notes, discharge summaries, and operative reports of over 4 million patients in  
496 the Mount Sinai data warehouse discovered mentions of the text term “Steel Syndrome”  
497 in 42 patient records. However, all of these patients were on dialysis for end stage renal  
498 disease, indicating that this mention was a misspelling of vascular Steal Syndrome,  
499 which is common in dialysis patients. This suggests that Steel syndrome might be  
500 largely undiagnosed. Attempts are currently being made to re-contact BioMe

501 participants with suspected Steel syndrome, and a genetic test is now available at  
502 Mount Sinai (website: <http://sema4genomics.com/products/test-catalog/>).

503 This study highlights the benefits of incorporating statistical and population genetics  
504 approaches in medical genetic research. First, we demonstrated that leveraging distant  
505 relationships *via* IBD mapping was better powered for discovery of the *COL27A1* variant  
506 compared to a more typical GWAS approach (i.e. genotype, imputation, and SNP  
507 association). As sample sizes increase in health systems and biobanks, the odds of a  
508 new individual being a direct or distant relative of someone already in the database  
509 increases exponentially<sup>98</sup>, enabling the detection of shared haplotypes harboring rarer  
510 causal variants and better-powered IBD mapping studies. Second, we inferred that  
511 *COL27A1*.pG697R variant arose on a Native American haplotype, and we estimate that  
512 the allele may have segregated at a carrier frequency of 25-30% in pre-Columbian  
513 Taíno populations and/or been driven to its current frequency by a bottleneck that  
514 occurred during the early days of colonization in Puerto Rico. Therefore this study not  
515 only helps estimate population attributable risk of *COL27A1*.pG697R in Puerto Rican  
516 populations, but also to predict other populations potentially at risk, including other  
517 Caribbean and Taíno populations. Targeted population screening of *COL27A1*.pG697R  
518 could potentially provide personalized health management, surveillance for associated  
519 complications, guidelines for intervention (particularly in newborns<sup>59</sup>), and improved  
520 reproductive choices.

521 This work also highlights some of the current challenges in the emerging field of  
522 genomic medicine. We demonstrated that evidence from EHRs could be readily  
523 extracted and retrospectively used to characterize clinical features of a musculoskeletal



524 genetic disorder. However, features of many other genetic disorders may not be  
525 detectable via routine clinical exam, lab tests and radiologics, and may not be amenable  
526 to such an approach. Furthermore, statistical methods for population-scale disease  
527 variant discovery, which were predominantly developed for cohorts collected for genetic  
528 research, may not be optimally calibrated for discovery in patient populations  
529 encountered in health systems. Finally, many genetic disorders are very rare, or have  
530 more complex genetic underpinnings, which would reduce power for detection using the  
531 strategy we have described. However, recent efforts, such as the Precision Medicine  
532 Initiative, that focus on the broad adoption of genomics in medicine, combined with  
533 international efforts to catalog rare genetic diseases, are primed to increase the rate of  
534 incidental genetic diagnosis of disease.

535 In summary, this work demonstrates the utility of biobanks for exploring full medical  
536 phenomes, and highlights the importance of documenting a wider spectrum of genetic  
537 disorders, in large and diverse populations of humans. In particular, this method  
538 provides a bridge between classical medical genetic methods and those employed in  
539 population-level GWAS. Here we note that the *COL27A1* variant is very rare in current  
540 large-scale genomic databases used for clinical research. Thus traditional association  
541 strategies and ascertainment bias focused on populations of European descent would  
542 have failed to identify and characterize this disorder and its public health burden. As  
543 ours and other recent studies have demonstrated, EHR-embedded research will be  
544 increasingly important for disentangling the pathology of rare genetic disorders, and  
545 understanding the continuum of complex and Mendelian disease. As studies grow in  
546 size, and healthcare systems learn to leverage the wealth of information captured in the

547 EHR, there is a need to provide relevant medical information to any patient entering the  
548 clinic anywhere in the world. Methods like that described here allow for precision  
549 medicine with a truly global outlook.

## 550 **Materials and Methods**

### 551 *BioMe Biobank Program*

552 Study participants were recruited from the BioMe Biobank Program of The Charles  
553 Bronfman Institute for Personalized Medicine at Mount Sinai Medical Center from 2007  
554 onward. The BioMe Biobank Program (Institutional Review Board 07–0529) operates  
555 under a Mount Sinai Institutional Review Board-approved research protocol. All study  
556 participants provided written informed consent. Of the approximately 38000 participants  
557 currently enrolled in BioMe, N=10511 unrelated are genotyped on the Illumina Infinium  
558 OmniExpress (OMNI) array. 5102 of these participants self-report as “Hispanic or  
559 Latino”, 3080 as “African American or African”, 2078 as “White or Caucasian”, 89 as  
560 “Mixed” and 162 as “Other”. Country of origin information is available for all but N=5  
561 participants, with N=6553 reporting being born in the United States and the remaining  
562 N=3953 report being born outside of the US. Parental and grandparental country of  
563 origin information is only available for a small subset of individuals genotyped on the  
564 OMNI array (N=43). An additional N=10471 participants were genotyped on the Illumina  
565 Infinium Multi Ethnic Genotyping array (MEGA) v1.0. Of these, approximately 4704 self-  
566 reported “Hispanic or Latino” ethnicity, 3143 self-reported as “African American or  
567 African”, 22 self-reported as “White/Caucasian”, 708 self-reported as “Mixed” and 1894  
568 self-reported as “Other”. Country of birth information was available for all but a small

569 number of participants (N=228), with 5190 reporting being born in the United States,  
570 and the remaining 5053 self-reporting being born elsewhere. Parental and  
571 grandparental country of origin information is available for 4323 individuals genotyped  
572 on the MEGA array.

### 573 *OmniExpress Genotyping and QC*

574 Genotyping of 12749 BioMe participants was performed on the Illumina Infinium  
575 OmniExpress plus HumanExome array. Calling was performed using the  
576 GenomeStudio software. A total of 1093 individuals were removed prior to zCall due to  
577 plate failure (N=672), unambiguous discordance between genetic and EHR recorded  
578 sex (N=693), a call rate of <98% (N=834), or deviances in levels of heterozygosity  
579 (N=773 in total). This was defined as having either an inbreeding coefficient outside the  
580 range -0.1 and 0.3 for common alleles (MAF >1%), or between 0.4 and 0.9 for rare  
581 alleles (MAF <1%). Additional quality control of 11656 individuals was performed using  
582 PLINK1.7<sup>55</sup> (RRID:SCR\_001757). An individual with a call rate of <99% was also  
583 excluded (N=1), along with intentional genetic duplicates (PiHat >0.8, N=444). Site-level  
584 quality control consisted of the removal of SNPs with a call rate of <95% (n=42217), and  
585 the removal of sites that were significantly out of Hardy-Weinberg equilibrium ( $p < 1 \times 10^{-5}$ ;  
586 n=39660) when calculated for self-reported EA, AA and H/L separately. Palindromic  
587 sites and those that deviated considerably from the 1000 Genomes project allele  
588 frequencies (<40% *versus* >60%) were also removed to ensure uniform stranding  
589 across datasets. After QC steps, 11212 participants and 866864 SNPs remained for  
590 downstream analysis.

## 591 *IBS Relatedness Estimates and Estimation of Inbreeding Co-efficient*

592 Pairwise IBS-based relationship estimates were derived for BioMe participants  
593 (N=11212) using the RELATEAdmix software<sup>41</sup>, which accounts for inflation of IBS  
594 statistic due to admixture linkage disequilibrium in admixed populations. To include  
595 allele frequency information and global ancestry proportions from ancestral populations  
596 relevant for each admixed population in the analysis. These were estimated using  
597 ADMIXTURE<sup>99</sup> (RRID:SCR\_001263) H/L samples were merged with the Utah  
598 Residents (CEPH) with Northern and Western European Ancestry (CEU; N=100),  
599 Yoruba in Ibadan, Nigeria (YRI; N=100) and Native American (NA; N=43; including  
600 Nauha, Ayamaran, Mayan and Quechan individuals) and used as input for the  
601 ADMIXTURE software, which was run unsupervised at k=3. ADMIXTURE analysis  
602 confirmed that NA reference panel comprised > 99% proportion Native American  
603 genetic ancestry (**Figure 4 – figure supplement 2**). European-American (EA)  
604 individuals were merged with the CEU and a panel of self-reported Ashkenazi Jewish  
605 individuals genotyped on OMNI from BioMe (AJ; N=100) and run unsupervised at k=2.  
606 AA samples were merged with the CEU and YRI reference panels and run  
607 unsupervised at k=2. After intersecting with reference panels 99296 SNPs were used as  
608 the input for RELATEAdmix..

## 609 *Principal Component Analysis*

610 Principal Component Analysis (PCA) was performed using the SMARTPCAv10210  
611 software from the EIGENSOFTv5.0.1 (RRID:SCR\_004965)<sup>44</sup> in 10511 unrelated BioMe  
612 participants. Regions containing the Human Leukocyte Antigen (chr6: 27000000-

613 35000000 (NCBI37/hg19)), Lactase gene (chr2:135000000-137000000 (NCBI37/hg19))  
614 and a common inversion (chr8:60000000-160000000 (NCBI37/hg19)), all of which are  
615 regions known to confound PCA analysis were removed from the genotype data prior to  
616 analysis. Data were merged with a reference panel of 2504 individuals from Phase 3 of  
617 the 1000 Genomes project (RRID:SCR\_006828)<sup>42</sup> that was constructed by extracting  
618 OmniExpress sites from whole-genome sequence data. Following this, a further two  
619 other relevant reference panels were added: a the NA (N=43), and a AJ (N=100) panels  
620 described above. A total of 174468 SNPs remained after intersecting the data with  
621 these reference panels.

#### 622 *Identity-by-Descent Tract Inference and Clustering*

623 Phased genotype data were filtered to MAF > 0.01 and converted to PLINK format using  
624 the FCGENE software<sup>100</sup> (we avoided using PLINK software for the conversion process  
625 in order to retain the phase information). Recombination maps from HapMap II (Build  
626 GRCh37/hg19) were intersected with the genotyped sites (n=490510 SNPs).  
627 GERMLINE (RRID:SCR\_001720)<sup>45</sup> was used to infer tracts of identity by descent > 3cM  
628 across all pairs of BioMe individuals (N=11212) using the following flags: “-min\_m 3 -  
629 err\_hom 0 -err\_het 2 -bits 25 -haploid”. IBD haplotypes that fell within or overlapped  
630 with centromeres, telomeres and regions of low complexity were removed from the  
631 GERMLINE output using an in-house Ruby script. Additional quality control measures  
632 consisted of the exclusion of regions of the genome where the depth of IBD-sharing  
633 (that is, the number of pairwise IBD-haplotypes that contain a given locus of the

634 genome) exceeded 4 standard deviations from the genome-wide mean (**Figure 2 –**  
635 **figure supplement 6**).

636 IBD clustering to identify ‘cliques’ of three or more IBD haplotypes shared between  
637 multiple individuals was then performed using the efficient connect-component-based  
638 clustering version of the Dash Associated Shared Haplotypes algorithm (DASH)<sup>101</sup>,  
639 using the default parameters. As a further quality control measure IBD-sharing ‘cliques’  
640 inferred by DASH that exhibited excessive sharing (which we defined as clique  
641 membership that exceeded 4 s.d. above the genome-wide mean) were removed  
642 (**Figure 2 –figure supplement 7**). Data was outputted from DASH in PLINK tped  
643 format, and alleles were encoded as; homozygote member in a clique as “2”,  
644 heterozygote member as “1” and everyone else not a member in the clique encoded as  
645 “0”.

#### 646 *Population-level IBD sharing*

647 We calculated the length of any pairwise IBD tract (or sum of the lengths if a pair of  
648 individuals shared more than one tract IBD) for each IBD sharing pair within each  
649 population to obtain an estimate of the mean and variance of pairwise sharing per  
650 population. To compare the tract length distribution between populations (of size  $N$ ), we  
651 first binned pairwise IBD tracts by length bin in 0.01cM increments. We then summed  
652 the number of pairwise IBD tracts falling into each length bin ( $x$ ), and divided this  
653 number by the number of possible pairwise IBD sharing for each population:  $N*(N-1)/2$ .

#### 654 *Height Measurement and Transformation*

655 A self-reported measurement of height in feet and inches was recorded for each  
656 participant at enrollment into the BioMe program. Raw height data were stratified on the  
657 basis of sex for all individuals who were inferred to be of Puerto Rican ancestry  
658 (N=2816). Height data was then log transformed and converted to age-adjusted Z-  
659 scores. Participants were excluded on the basis of age reported at the point of  
660 enrollment, with a minimum cut-off of 18 years old for females (N=0) and 22 for males  
661 (N=0), and a maximum cut off of 79 years old for both sexes (N=194) leaving a total of  
662 n=2622 PR.

### 663 *Association of IBD-cliques with height under a recessive model*

664 Association of IBD clique membership with height as a continuous trait was performed  
665 under a recessive model using PLINKv1.9<sup>56</sup> using the “*--linear recessive*” flag. Age and  
666 sex adjusted Z-scores for height were used as the outcome variable. IBD clique  
667 membership was used as the primary predictor variable and the first five PCA  
668 eigenvectors were used as covariates. The model was run across a total of 2622 PR  
669 ancestry individuals and a total of 480 IBD-cliques where at least 3 individuals were  
670 homozygous for the IBD haplotype.

### 671 *Genome Wide Association of Imputed Data under a Recessive Model*

672 Genotype data for all of the BioMe individuals ascertained on the Illumina OMNI  
673 Express array (N=11212) were phased together using SHAPEIT2<sup>102,103</sup>. Imputation was  
674 subsequently performed in 5MB chunks using IMPUTE2 (RRID:SCR\_013055)<sup>104</sup> via the  
675 flags ‘*-Ne 20000 -buffer 250 -filt\_rules\_1 'ALL<0.0002' 'ALL>0.9998*’ with a reference

676 panel derived from Phase 3 data from the 1000 Genomes project. A total of 46538253  
677 SNPs were imputed from 828109 directly genotyped SNPs.

678

679 We ran a recessive GWAS on the same 2622 inferred Puerto Rican ancestry individuals  
680 used in our recessive IBD-mapping model. The association was run over hard-called  
681 data using the PLINKv1.9 software using the “*--linear recessive*” flag. Age and sex  
682 adjusted Z-scores for height were used as the phenotypic outcome and the first five PC  
683 eigenvectors were used as covariates. Analysis was restricted to SNPs with  $\geq 2$   
684 observations of individuals homozygous for the minor allele (as the only 2 of the 3  
685 homozygotes had been imputed correctly), and SNPs with an INFO score of  $\geq 0.3$   
686 ( $n=10007795$  SNPs in total).

### 687 *Whole Genome Sequencing*

688 Genomic libraries were prepared from DNA obtained for the four IBD homozygous  
689 individuals. DNA was sheared to 300 bp on a Covaris E220, libraries were made using  
690 the NEBNext Ultra DNA Library Prep kit for Illumina. The libraries were submitted for  
691 Whole Genome Sequencing (WGS) at the Mount Sinai Genomic Core using the Illumina  
692 HiSeq 2500 system, performed by the Genomics Core Facility of the Icahn Institute for  
693 Genomics and Multiscale Biology, Icahn School of Medicine at Mount Sinai. Reads  
694 were aligned to the NCBI37/hg19 reference genome and variants were called using the  
695 sequence analysis pipeline by Linderman *et al*<sup>105</sup> Variant calls and coverage at every  
696 site at the genomic interval spanned by the candidate IBD haplotype (chr9:112000000-  
697 118000000bp (NCBI37/hg19)) were obtained using the “*-out\_mode EMIT\_ALL\_SITES*”



698 flag in GATKv3.2-72 (RRID:SCR\_001876). For summary statistics of whole genome  
699 sequencing (WGS) see **Supplement file 1**.

700 *In Silico analysis and validation of COL27A1.pG967R*

701 WGS variant calls were annotated with allele frequency information and *in silico*  
702 prediction scores for SIFT, PhyloP, GERP generated using snpEffv3.0  
703 (RRID:SCR\_005191) as part of the sequence analysis pipeline published by Linderman  
704 *et al*<sup>105</sup>. We identified all genomic variants that were present in at least 6 copies across  
705 the four IBD-homozygotes and that lay within the shared boundary of the IBD haplotype.  
706 Using this criteria, only one rare, coding variant was found to be shared between all four  
707 homozygotes, namely a point mutation in the gene *COL27A1* (g.9:116958257.C>G,  
708 NM\_032888.1, p.G697R, rs140950220) which was present in 7 copies (with 3  
709 individuals being homozygous, and the fourth being heterozygous). The rs140950220  
710 G/C allele status was validated by Sanger sequencing of exon 7 in the *COL27A1* gene  
711 in all four individuals. We also validated *COL27A1.pG697R* status in individuals carrying  
712 the significant IBD-clique at 9q32 using the Fluidigm SNPTyping assay adhering to the  
713 standard protocol. All individuals carrying at least one copy of the top IBD-haplotype  
714 (N=59) were genotyped for the rs140950220 variant in addition to a panel of age and  
715 sex matched Puerto Rican ancestry controls (N=59).

716 *Genotyping COL27A1.pG697R in a Multi-Ethnic Population of PAGE*

717 We estimated the frequency of the *COL27A1.pG697R* (dbSNP=rs140950220) variant in  
718 the Population Architecture using Genomics and Epidemiology (PAGE) study. The

719 PAGE study comprises a diverse global reference panel from five studies. African-  
720 American and Hispanic/Latino women from the Women's Health Initiative (WHI), a  
721 multi-center cohort study investigating post-menopausal women's health in the US and  
722 recruited women at 40 centers across the US. Self-identified Hispanic/Latinos from four  
723 sites in San Diego, CA, Chicago, IL, Bronx, NY, and Miami, FL as part of the Hispanic  
724 Community Health Study / Study of Latinos (HCHS/SOL). African American, Japanese  
725 American, and Native Hawaiian participants from the Multiethnic Cohort (MEC)  
726 prospective cohort study recruiting men and women from Hawaii and California. The  
727 Global Reference Panel (GRP) created by Stanford University contributed samples  
728 including; a population sample of Andean individuals primarily of Quechuan/Aymaran  
729 ancestry from Puno, Peru; a population sample of Easter Island (Rapa Nui), Chile;  
730 individuals of indigenous origin from Oaxaca, Mexico, Honduras, Colombia, the Nama  
731 and Khomani KhoeSan populations of the Northern Cape, South Africa; the Human  
732 Genome Diversity Panel in collaboration with the Centre Etude Polymorphism Humain  
733 (CEPH) in Paris; and the Maasai in Kinyawa, Kenya (MKK) dataset from the  
734 International Hapmap Project hosted at Coriell. Finally, the BioMe biobank in the Mount  
735 Sinai health system, New York City, contributed African-American, Hispanic/Latino, and  
736 participants who reported as mixed or other ancestry to the PAGE study, ~50% of whom  
737 were born outside New York City and for whom country-of-birth information was  
738 available. In all, participants in the PAGE Study represent a global reference panel of  
739 112 populations ranging from 4-17773 individuals in size (**Supplement file 4**). Samples  
740 in the PAGE study were genotyped on the Illumina Multi-Ethnic Genotyping Array  
741 (MEGA), which included direct genotyping of the rs140950220 variant. A total of 53338

742 PAGE and GRP samples were genotyped on the MEGA array at the Johns Hopkins  
743 Center for Inherited Disease Research (CIDR), with 52878 samples successfully  
744 passing CIDR's QC process. Genotyping data that passed initial quality control at CIDR  
745 were released to the Quality Assurance / Quality Control (QA/QC) analysis team at the  
746 University of Washington Genetics Coordinating Center (UWGCC). The UWGCC  
747 further cleaned the data according to previously described methods<sup>106</sup> and returned  
748 genotypes for 51520 subjects. A total of 1705969 SNPs were genotyped on the  
749 MEGA. The COL27A1.pG697R variant passed the following filters; (1) CIDR technical  
750 filters, (2) SNPs with missing call rate  $\geq 2\%$ , (3) SNPs with more than 6 discordant  
751 calls in 988 study duplicates, (4) SNPs with greater than 1 Mendelian errors in 282 trios  
752 and 1439 duos, (5) SNPs with a Hardy-Weinberg  $p < 10^{-10}$ , (6) positional duplicates.

### 753 *Structural modeling of the COL27A1.PG697R missense variant*

754 We downloaded X-ray crystal coordinates (1CAG from Bella *et al*<sup>64</sup>; [www.pdb.org](http://www.pdb.org)) on  
755 January 21, 2017. Visualization and modeling of the missense variant were performed  
756 in PyMol ([www.pymol.org](http://www.pymol.org); RRID:SCR\_000305).

757

### 758 *Phenome-Wide Association Study*

759 To test for clinical symptoms of Steel syndrome in COL27A1.pG967R carriers, we  
760 performed a Phenome-Wide Association Study (PheWas) with EHR-derived ICD9 billing  
761 codes as the phenotypic outcome. In the association model, for each individual ICD9  
762 codes were encoded as "1" if the ICD9 was present in their EHR, and "0" if the ICD9  
763 code was absent. Carrier status for COL27A1.pG697R was used as the primary

764 predictor variable, with heterozygous individuals encoded as “1”, non-carriers encoded  
765 a “0” and homozygotes excluded from the analysis. We restricted the analysis to  
766 carriers of *COL27A1*.pG697R (n=106) and non-carriers (n=4480) who either reported  
767 being born in Puerto Rico or who were US-born, self-identified as H/L and overlapped  
768 with Puerto Rican born individuals in principal component analysis. Age, sex and the  
769 first 5 principal components were included as covariates in our model. The regression  
770 was performed using four methods; Generalized Linear Models (GLM) using the `glm()`  
771 function in Rv3.2.1; a score test based on the saddlepoint approximation (SPATest)  
772 using the `SPAtest()` function in Rv3.2.1; a score test using a base adjustment for rare  
773 variants (Firth test) using the `logistf()` function in Rv3.2.1; and a linear mixed model  
774 using the GCTAv1.24.2 software with a genetic relationship matrix constructed from  
775 281666 SNPs shared between the OMNI and MEGA arrays (MAF  $\geq$  1%). To adjust for  
776 multiple tests, raw p-values were adjusted for false discovery rate using the `p.adjust()`  
777 function in R, and only those below an FDR adjusted p-value of 0.05 were reported as  
778 significant.

### 779 *Clinical review of patient records*

780 Information from inpatient, outpatient, emergency and private practice settings housed  
781 in the Mount Sinai health system since 2004 was reviewed by two clinical experts  
782 independently. This data includes laboratory reports, radiological data, pathology  
783 results, operative and inpatient/outpatient progress notes, discharge summaries,  
784 pharmacy, and nurses reports. The clinical experts examined for clinical features similar  
785 to those reported for Steel syndrome cases in Flynn et al 2010<sup>59</sup>, including

786 developmental dysplasia of the hip (or congenital hip dysplasia), carpal coalition,  
787 scoliosis, and joint and spine anomalies. Both clinical experts reviews patient records  
788 independently and compared notes to resolve discrepancies. They reviewed the records  
789 of the 34 youngest *COL27A1.pG697R* carriers (mean age 42), and compared their  
790 findings to 31 randomly selected age and sex matched Puerto Rican non-carriers, and  
791 also to published reports of population prevalences of key clinical features for similar  
792 age groups where available.

### 793 *Local Ancestry Estimation*

794 Due to the process of recombination, individuals from populations that have undergone  
795 recent admixture can exhibit a mosaic of genetic ancestry along their genome. Their  
796 genetic ancestry at a given genomic segment (referred to as local ancestry), can be  
797 inferred from genotype data with the use of non-admixed reference panels of known  
798 continental ancestry. We calculated local ancestry in the three homozygous Puerto  
799 Rican individuals genotyped on OMNI by first extracting the intersecting sites of the  
800 Affymetrix 6.0 array (n=593729 SNPs in total) and merging them with 3 ancestral  
801 reference panels. These reference panels consisted of the CEU and YRI samples from  
802 the 1000 Genomes Project in addition to the Native American reference panel described  
803 previously that were used as a proxy for European, African and Native American  
804 ancestral source populations, respectively. RFMix<sup>84</sup> was used to infer local ancestry.

### 805 *Calculation of Historical Effective Population Size in Puerto Ricans*

806 To investigate evidence of a founder effect in Puerto Ricans we ran the IBDNe  
807 software<sup>85</sup> in 2816 Puerto Ricans from the discovery effort using the cleaned set of  
808 pairwise IBD-haplotypes inferred using GERMLINE. IBDNe was run using the default  
809 parameters, including an assumed generation time of 25 years.

## 810 **Acknowledgements**

811 We would like to thank Noah Zaitlen, Alexander Gusev, George Diaz, Rounak Dey, and  
812 Alicia Martin for their helpful suggestions in preparing this manuscript. This work was  
813 supported by funds from several grants; The Population Architecture Using Genomics  
814 and Epidemiology (PAGE) program is funded by the National Human Genome  
815 Research Institute, with co-funding from the National Institute on Minority Health and  
816 Health Disparities, supported by U01HG007416, U01HG007417, U01HG007397,  
817 U01HG007376, and U01HG007419. The PAGE consortium thanks the staff and  
818 participants of all PAGE studies for their important contributions. The complete list of  
819 PAGE members can be found at <http://www.pagestudy.org>. Genotyping services were  
820 provided by the Center for Inherited Disease Research (CIDR). CIDR is fully funded  
821 through a federal contract from the National Institutes of Health to The Johns Hopkins  
822 University, contract number HHSN268201200008I. Genotype data quality control and  
823 quality assurance services were provided by the Genetic Analysis Center in the  
824 Biostatistics Department of the University of Washington, through support provided by  
825 the CIDR contract. High performance computing was supported in part through the  
826 computational resources and staff expertise provided by Scientific Computing at the  
827 Icahn School of Medicine at Mount Sinai and through the Office of Research

828 Infrastructure under award number S10OD018522. The content is solely the  
829 responsibility of the authors and does not necessarily represent the official views of the  
830 National Institutes of Health.

## 831 **References**

- 832 1. Hamosh, A., Scott, A.F., Amberger, J., Valle, D., and McKusick, V.A. (2000). Online  
833 Mendelian Inheritance in Man (OMIM). *Hum. Mutat.* *15*, 57–61.
- 834 2. McCarthy, J.J., McLeod, H.L., and Ginsburg, G.S. (2013). Genomic medicine: a  
835 decade of successes, challenges, and opportunities. *Sci. Transl. Med.* *5*, 189sr4.
- 836 3. Bamshad, M.J., Ng, S.B., Bigham, A.W., Tabor, H.K., Emond, M.J., Nickerson, D. a.,  
837 and Shendure, J. (2011). Exome sequencing as a tool for Mendelian disease gene  
838 discovery - Supplementary information. *Nat. Rev. Genet.* *12*, 745–755.
- 839 4. Manolio, T. a, Chisholm, R.L., Ozenberger, B., Roden, D.M., Williams, M.S., Wilson,  
840 R., Bick, D., Bottinger, E.P., Brilliant, M.H., Eng, C., et al. (2013). Implementing genomic  
841 medicine in the clinic: the future is here. *Genet. Med.* *15*, 258–267.
- 842 5. Manolio, T.A., Abramowicz, M., Al-Mulla, F., Anderson, W., Balling, R., Berger, A.C.,  
843 Bleyl, S., Chakravarti, A., Chisholm, R.L., Dissanayake, V.H.W., et al. (2015). Global  
844 implementation of genomic medicine : We are not alone. *Sci. Transl. Med.* *7*, 1–8.
- 845 6. Philippakis, A.A., Azzariti, D.R., Beltran, S., Brookes, A.J., Brownstein, C.A., Brudno,  
846 M., Brunner, H.G., Buske, O.J., Carey, K., Doll, C., et al. (2015). The Matchmaker  
847 Exchange: A Platform for Rare Disease Gene Discovery. *Hum. Mutat.* *36*, 915–921.
- 848 7. Chong, J., Yu, J.-H., Lorentzen, P., Park, K., Jamal, S.M., Tabor, H.K., Rauch, A.,  
849 Saenz, M.S., Boltshauser, E., Patterson, K.E., et al. (2015). Gene discovery for  
850 Mendelian conditions via social networking: de novo variants in KDM1A cause  
851 developmental delay and distinctive facial features. *bioRxiv* 028241.
- 852 8. Collins, F.S., and Varmus, H. (2015). A New Initiative on Precision Medicine. *N. Engl.*  
853 *J. Med.* *372*, 793–795.
- 854 9. Ashley, E.A. (2015). The Precision Medicine Initiative. *JAMA* *313*, 2119.
- 855 10. Collins, R. (2012). What makes UK Biobank special? *Lancet* *379*, 1173–1174.
- 856 11. Dewey, F.E., Murray, M.F., Overton, J.D., Habegger, L., Leader, J.B., Fetterolf,  
857 S.N., O’Dushlaine, C., Van Hout, C. V, Staples, J., Gonzaga-Jauregui, C., et al. (2016).

- 858 Distribution and clinical impact of functional variants in 50,726 whole-exome sequences  
859 from the DiscovEHR study. *Science* 354, aaf6814.
- 860 12. Feldman, G.L. (2016). 2016 ACMG Annual Meeting presidential address: the  
861 practice of medical genetics: myths and realities. *Genet. Med.* 18, 957–959.
- 862 13. Ashley, E.A. (2016). Towards precision medicine. *Nat. Rev. Genet.* 17, 507–522.
- 863 14. Abul-Husn, N.S., Manickam, K., Jones, L.K., Wright, E.A., Hartzel, D.N., Gonzaga-  
864 Jauregui, C., O’Dushlaine, C., Leader, J.B., Lester Kirchner, H., Lindbuchler, D.M., et al.  
865 (2016). Genetic identification of familial hypercholesterolemia within a single U.S. health  
866 care system. *Science* 354, aaf7000.
- 867 15. Yang, Y., Muzny, D.M., Xia, F., Niu, Z., Person, R., Ding, Y., Ward, P., Braxton, A.,  
868 Wang, M., Buhay, C., et al. (2014). Molecular Findings Among Patients Referred for  
869 Clinical Whole-Exome Sequencing. *JAMA* 312, 1870.
- 870 16. Taylor, J.C., Martin, H.C., Lise, S., Broxholme, J., Cazier, J.B., Rimmer, A.,  
871 Kanapin, A., Lunter, G., Fiddy, S., Allan, C., et al. (2015). Factors influencing success of  
872 clinical genome sequencing across a broad spectrum of disorders. *Nat Genet* 47, 717–  
873 726.
- 874 17. Chong, J.X., Buckingham, K.J., Jhangiani, S.N., Boehm, C., Sobreira, N., Smith,  
875 J.D., Harrell, T.M., McMillin, M.J., Wiszniewski, W., Gambin, T., et al. (2015). The  
876 Genetic Basis of Mendelian Phenotypes: Discoveries, Challenges, and Opportunities.  
877 *Am. J. Hum. Genet.* 97, 199–215.
- 878 18. Amendola, L.M., Jarvik, G.P., Leo, M.C., McLaughlin, H.M., Akkari, Y., Amaral,  
879 M.D., Berg, J.S., Biswas, S., Bowling, K.M., Conlin, L.K., et al. (2016). Performance of  
880 ACMG-AMP Variant-Interpretation Guidelines among Nine Laboratories in the Clinical  
881 Sequencing Exploratory Research Consortium. *Am. J. Hum. Genet.* 99, 247.
- 882 19. Katsanis, N. (2016). The continuum of causality in human genetic disorders.  
883 *Genome Biol.* 17, 233.
- 884 20. Manrai, A.K., Funke, B.H., Rehm, H.L., Olesen, M.S., Maron, B.A., Szolovits, P.,  
885 Margulies, D.M., Loscalzo, J., and Kohane, I.S. (2016). Genetic Misdiagnoses and the  
886 Potential for Health Disparities. *N. Engl. J. Med.* 375, 655–665.
- 887 21. Popejoy, A.B., and Fullerton, S.M. (2016). Genomics is failing on diversity. *Nature*  
888 538, 161–164.
- 889 22. Petrovski, S., Goldstein, D.B., Need, A., Goldstein, D., Bustamante, C., Burchard,  
890 E., Vega, F., Price, A., Patterson, N., Plenge, R., et al. (2016). Unequal representation  
891 of genetic variation across ancestry groups creates healthcare inequality in the  
892 application of precision medicine. *Genome Biol.* 17, 157.



- 893 23. Gottesman, O., Kuivaniemi, H., Tromp, G., Faucett, W.A., Li, R., Manolio, T. a,  
894 Sanderson, S.C., Kannry, J., Zinberg, R., Basford, M. a, et al. (2013). The Electronic  
895 Medical Records and Genomics (eMERGE) Network: past, present, and future. *Genet.*  
896 *Med.* *15*, 761–771.
- 897 24. Green, R.C., Goddard, K.A.B., Jarvik, G.P., Amendola, L.M., Appelbaum, P.S.,  
898 Berg, J.S., Bernhardt, B.A., Biesecker, L.G., Biswas, S., Blout, C.L., et al. (2016).  
899 Clinical Sequencing Exploratory Research Consortium: Accelerating Evidence-Based  
900 Practice of Genomic Medicine. *Am. J. Hum. Genet.* *98*, 1051–1066.
- 901 25. Blair, D.R., Lyttle, C.S., Mortensen, J.M., Bearden, C.F., Jensen, A.B., Khiabani,  
902 H., Melamed, R., Rabadan, R., Bernstam, E.V., Brunak, S., et al. (2013). A  
903 Nondegenerate Code of Deleterious Variants in Mendelian Loci Contributes to Complex  
904 Disease Risk. *Cell* *155*, 70–80.
- 905 26. Rehm, H.L., Berg, J.S., Brooks, L.D., Bustamante, C.D., Evans, J.P., Landrum,  
906 M.J., Ledbetter, D.H., Maglott, D.R., Martin, C.L., Nussbaum, R.L., et al. (2015).  
907 ClinGen—the Clinical Genome Resource. *N. Engl. J. Med.* *372*, 2235–2242.
- 908 27. Kirkpatrick, B.E., Riggs, E.R., Azzariti, D.R., Miller, V.R., Ledbetter, D.H., Miller,  
909 D.T., Rehm, H., Martin, C.L., and Faucett, W.A. (2015). GenomeConnect: Matchmaking  
910 Between Patients, Clinical Laboratories, and Researchers to Improve Genomic  
911 Knowledge. *Hum. Mutat.* *36*, 974–978.
- 912 28. Gahl, W.A., Mulvihill, J.J., Toro, C., Markello, T.C., Wise, A.L., Ramoni, R.B.,  
913 Adams, D.R., and Tiftt, C.J. (2016). The NIH Undiagnosed Diseases Program and  
914 Network: Applications to modern medicine. *Mol. Genet. Metab.* *117*, 393–400.
- 915 29. Browning, S.R., and Browning, B.L. (2011). Identity by Descent Between Distant  
916 Relatives: Detection and Applications. *Annu. Rev. Genet.* *46*, 120920150949000.
- 917 30. Houwen, R.H., Baharloo, S., Blankenship, K., Raeymaekers, P., Juyn, J., Sandkuijl,  
918 L.A., and Freimer, N.B. (1994). Genome screening by searching for shared segments:  
919 mapping a gene for benign recurrent intrahepatic cholestasis. *Nat. Genet.* *8*, 380–386.
- 920 31. Kenny, E.E., Gusev, A., Riegel, K., Lütjohann, D., Lowe, J.K., Salit, J., Maller, J.B.,  
921 Stoffel, M., Daly, M.J., Altshuler, D.M., et al. (2009). Systematic haplotype analysis  
922 resolves a complex plasma plant sterol locus on the Micronesian Island of Kosrae. *Proc.*  
923 *Natl. Acad. Sci. U. S. A.* *106*, 13886–13891.
- 924 32. Henden, L., Freytag, S., Afawi, Z., Baldassari, S., Berkovic, S.F., Bisulli, F.,  
925 Canafoglia, L., Casari, G., Crompton, D.E., Depienne, C., et al. (2016). Identity by  
926 descent fine mapping of familial adult myoclonus epilepsy (FAME) to 2p11.2???2q11.2.  
927 *Hum. Genet.* 1–9.

- 928 33. Qi, L., Cornelis, M.C., Kraft, P., Stanya, K.J., Kao, W.H.L., Pankow, J.S., Dupuis, J.,  
929 Florez, J.C., Fox, C.S., Paré, G., et al. (2010). Genetic variants at 2q24 are associated  
930 with susceptibility to type 2 diabetes. *Hum. Mol. Genet.* *19*, 2706–2715.
- 931 34. Traherne, J.A., Jiang, W., Valdes, A.M., Hollenbach, J.A., Jayaraman, J., Lane, J.A.,  
932 Johnson, C., Trowsdale, J., and Noble, J.A. (2016). KIR haplotypes are associated with  
933 late-onset type 1 diabetes in European-American families. *Genes Immun.* *17*, 8–12.
- 934 35. Shaw, M., Yap, T.Y., Henden, L., Bahlo, M., Gardner, A., Kalscheuer, V.M., Haan,  
935 E., Christie, L., Hackett, A., and Gecz, J. (2015). Identical by descent L1CAM mutation  
936 in two apparently unrelated families with intellectual disability without L1 syndrome. *Eur.*  
937 *J. Med. Genet.* *58*, 364–368.
- 938 36. Ko, J.M., Zhang, P., Law, S., Fan, Y., Song, Y.Q., Zhao, X.K., Wong, E.H.W., Tang,  
939 S., Song, X., Lung, M.L., et al. (2014). Identity-by-descent approaches identify regions  
940 of importance for genetic susceptibility to hereditary esophageal squamous cell  
941 carcinoma. *Oncol. Rep.* *32*, 860–870.
- 942 37. Lalli, M.A., Cox, H.C., Arcila, M.L., Cadavid, L., Moreno, S., Garcia, G., Madrigal, L.,  
943 Reiman, E.M., Arcos-Burgos, M., Bedoya, G., et al. (2014). Origin of the PSEN1 E280A  
944 mutation causing early-onset Alzheimer’s disease. *Alzheimer’s Dement.* *10*, S277–  
945 S283.
- 946 38. Visscher, P.M., McEvoy, B., and Yang, J. (2010). From Galton to GWAS:  
947 quantitative genetics of human height. *Genet. Res. (Camb).* *92*, 371–379.
- 948 39. Lango Allen, H., Estrada, K., Lettre, G., Berndt, S.I., Weedon, M.N., Rivadeneira, F.,  
949 Willer, C.J., Jackson, A.U., Vedantam, S., Raychaudhuri, S., et al. (2010). Hundreds of  
950 variants clustered in genomic loci and biological pathways affect human height. *Nature*  
951 *467*, 832–838.
- 952 40. Durand, C., and Rappold, G.A. (2013). Height matters-from monogenic disorders to  
953 normal variation. *Nat. Rev. Endocrinol.* *9*, 171–177.
- 954 41. Moltke, I., and Albrechtsen, A. (2014). RelateAdmix: A software tool for estimating  
955 relatedness between admixed individuals. *Bioinformatics* *30*, 1027–1028.
- 956 42. The 1000 Genomes Project Consortium (2015). A global reference for human  
957 genetic variation. *Nature* *526*, 68–74.
- 958 43. Mao, X., Bigham, A.W., Mei, R., Gutierrez, G., Weiss, K.M., Brutsaert, T.D., Leon-  
959 Velarde, F., Moore, L.G., Vargas, E., McKeigue, P.M., et al. (2007). A genomewide  
960 admixture mapping panel for Hispanic/Latino populations. *Am. J. Hum. Genet.* *80*,  
961 1171–1178.

- 962 44. Price, A.L., Patterson, N.J., Plenge, R.M., Weinblatt, M.E., Shadick, N.A., and  
963 Reich, D. (2006). Principal components analysis corrects for stratification in genome-  
964 wide association studies. *Nat. Genet.* 38, 904–909.
- 965 45. Gusev, A., Lowe, J.K., Stoffel, M., Daly, M.J., Altshuler, D., Breslow, J.L., Friedman,  
966 J.M., and Pe’er, I. (2009). Whole population, genome-wide mapping of hidden  
967 relatedness. *Genome Res.* 19, 318–326.
- 968 46. Gusev, A., Palamara, P.F., Aponte, G., Zhuang, Z., Darvasi, A., Gregersen, P., and  
969 Pe’er, I. (2012). The architecture of long-range haplotypes shared within and across  
970 populations. *Mol. Biol. Evol.* 29, 473–486.
- 971 47. Chiang, C.W.K., Ralph, P., and Novembre, J. (2016). Conflation of Short Identity-by-  
972 Descent Segments Bias Their Inferred Length Distribution. *G3 (Bethesda)*. 6, 1287–  
973 1296.
- 974 48. Browning, S.R., and Thompson, E.A. (2012). Detecting rare variant associations by  
975 identity-by-descent mapping in case-control studies. *Genetics* 190, 1521–1531.
- 976 49. Need, A.C., Kasperaviciute, D., Cirulli, E.T., and Goldstein, D.B. (2009). A genome-  
977 wide genetic signature of Jewish ancestry perfectly separates individuals with and  
978 without full Jewish ancestry in a large random sample of European Americans. *Genome*  
979 *Biol.* 10, R7.
- 980 50. Moreno-Estrada, A., Gravel, S., Zakharia, F., McCauley, J.L., Byrnes, J.K., Gignoux,  
981 C.R., Ortiz-Tello, P.A., Martínez, R.J., Hedges, D.J., Morris, R.W., et al. (2013).  
982 Reconstructing the Population Genetic History of the Caribbean. *PLoS Genet.* 9,.
- 983 51. Durand, C., and Rappold, G. a (2013). Height matters-from monogenic disorders to  
984 normal variation. *Nat. Rev. Endocrinol.* 9, 171–177.
- 985 52. eLife (2016). A century of trends in adult human height. *Elife* 5, 1–29.
- 986 53. Cohen, P., Rogol, A.D., Deal, C.L., Saenger, P., Reiter, E.O., Ross, J.L.,  
987 Chernausek, S.D., Savage, M.O., Wit, J.M., and 2007 ISS Consensus Workshop  
988 participants (2008). Consensus statement on the diagnosis and treatment of children  
989 with idiopathic short stature: a summary of the Growth Hormone Research Society, the  
990 Lawson Wilkins Pediatric Endocrine Society, and the European Society for Paediatric  
991 Endocrinology Workshop. *J. Clin. Endocrinol. Metab.* 93, 4210–4217.
- 992 54. Vacic, V., Ozelius, L.J., Clark, L.N., Bar-Shira, A., Gana-Weisz, M., Gurevich, T.,  
993 Gusev, A., Kedmi, M., Kenny, E.E., Liu, X., et al. (2014). Genome-wide mapping of IBD  
994 segments in an Ashkenazi PD cohort identifies associated haplotypes. *Hum. Mol.*  
995 *Genet.* 23, 4693–4702.

- 996 55. Purcell, S., Neale, B., Todd-Brown, K., Thomas, L., Ferreira, M.A.R., Bender, D.,  
997 Maller, J., Sklar, P., de Bakker, P.I.W., Daly, M.J., et al. (2007). PLINK: A tool set for  
998 whole-genome association and population-based linkage analyses. *Am. J. Hum. Genet.*  
999 *81*, 559–575.
- 1000 56. Chang, C.C., Chow, C.C., Tellier, L.C., Vattikuti, S., Purcell, S.M., and Lee, J.J.  
1001 (2015). Second-generation PLINK: rising to the challenge of larger and richer datasets.  
1002 *Gigascience* *4*, 7.
- 1003 57. Gonzaga-Jauregui, C., Gamble, C.N., Yuan, B., Penney, S., Jhangiani, S., Muzny,  
1004 D.M., Gibbs, R.A., Lupski, J.R., and Hecht, J.T. (2015). Mutations in COL27A1 cause  
1005 Steel syndrome and suggest a founder mutation effect in the Puerto Rican population.  
1006 *Eur. J. Hum. Genet.* *23*, 342–346.
- 1007 58. Steel, H.H., Piston, R.W., Clancy, M., and Betz, R.R. (1993). A syndrome of  
1008 dislocated hips and radial heads, carpal coalition, and short stature in Puerto Rican  
1009 children. *J. Bone Jt. Surg. - Ser. A*. *75* ()(pp 259-264), 1993.Date Publ. 1993. *75*, 259–  
1010 264.
- 1011 59. Flynn, J.M., Ramirez, N., Betz, R., Mulcahey, M.J., Pino, F., Herrera-Soto, J. a,  
1012 Carlo, S., and Cornier, A.S. (2010). Steel syndrome: dislocated hips and radial heads,  
1013 carpal coalition, scoliosis, short stature, and characteristic facial features. *J. Pediatr.*  
1014 *Orthop.* *30*, 282–288.
- 1015 60. Pace, J.M., Corrado, M., Missero, C., and Byers, P.H. (2003). Identification,  
1016 characterization and expression analysis of a new fibrillar collagen gene, COL27A1.  
1017 *Matrix Biol.* *22*, 3–14.
- 1018 61. Plumb, D.A., Ferrara, L., Torbica, T., Knowles, L., Mironov, A., Kadler, K.E., Briggs,  
1019 M.D., and Boot-Handford, R.P. (2011). Collagen XXVII Organises the Pericellular Matrix  
1020 in the Growth Plate. *PLoS One* *6*, e29422.
- 1021 62. Christiansen, H.E., Lang, M.R., Pace, J.M., and Parichy, D.M. (2009). Critical Early  
1022 Roles for col27a1a and col27a1b in Zebrafish Notochord Morphogenesis, Vertebral  
1023 Mineralization and Post-embryonic Axial Growth. *PLoS One* *4*, e8481.
- 1024 63. Persikov, A. V., Pillitteri, R.J., Amin, P., Schwarze, U., Byers, P.H., and Brodsky, B.  
1025 (2004). Stability related bias in residues replacing glycines within the collagen triple  
1026 helix (Gly-Xaa-Yaa) in inherited connective tissue disorders. *Hum. Mutat.* *24*, 330–337.
- 1027 64. Bella, J., Eaton, M., Brodsky, B., and Berman, H.M. (1994). Crystal and molecular  
1028 structure of a collagen-like peptide at 1.9 Å resolution. *Science* *266*, 75–81.
- 1029 65. McGrory, J., Costa, T., and Cole, W.G. (1996). A novel G499D substitution in the  
1030 alpha 1(III) chain of type III collagen produces variable forms of Ehlers-Danlos  
1031 syndrome type IV. *Hum. Mutat.* *7*, 59–60.

- 1032 66. Tromp, G., De Paepe, A., Nuytinck, L., Madhatheri, S., and Kuivaniemi, H. (1995).  
1033 Substitution of valine for glycine 793 in type III procollagen in Ehlers-Danlos syndrome  
1034 type IV. *Hum. Mutat.* *5*, 179–181.
- 1035 67. Anderson, D.W., Thakker-Varia, S., Tromp, G., Kuivaniemi, H., and Stolle, C.A.  
1036 (1997). A glycine (415)-to-serine substitution results in impaired secretion and  
1037 decreased thermal stability of type III procollagen in a patient with Ehlers-Danlos  
1038 syndrome type IV. *Hum. Mutat.* *9*, 62–63.
- 1039 68. Knebelmann, B., Deschenes, G., Gros, F., Hors, M.C., Grünfeld, J.P., Zhou, J.,  
1040 Tryggvason, K., Gubler, M.C., and Antignac, C. (1992). Substitution of arginine for  
1041 glycine 325 in the collagen alpha 5 (IV) chain associated with X-linked Alport syndrome:  
1042 characterization of the mutation by direct sequencing of PCR-amplified lymphoblast  
1043 cDNA fragments. *Am. J. Hum. Genet.* *51*, 135–142.
- 1044 69. Zhou, J., Hertz, J.M., and Tryggvason, K. (1992). Mutation in the alpha 5(IV)  
1045 collagen chain in juvenile-onset Alport syndrome without hearing loss or ocular lesions:  
1046 detection by denaturing gradient gel electrophoresis of a PCR product. *Am. J. Hum.*  
1047 *Genet.* *50*, 1291–1300.
- 1048 70. Starman, B.J., Eyre, D., Charbonneau, H., Harrylock, M., Weis, M.A., Weiss, L.,  
1049 Graham, J.M., and Byers, P.H. (1989). Osteogenesis imperfecta. The position of  
1050 substitution for glycine by cysteine in the triple helical domain of the pro alpha 1(I)  
1051 chains of type I collagen determines the clinical phenotype. *J. Clin. Invest.* *84*, 1206–  
1052 1214.
- 1053 71. Shapiro, J.R., Stover, M.L., Burn, V.E., McKinstry, M.B., Burshell, A.L., Chipman,  
1054 S.D., and Rowe, D.W. (1992). An osteopenic nonfracture syndrome with features of  
1055 mild osteogenesis imperfecta associated with the substitution of a cysteine for glycine at  
1056 triple helix position 43 in the pro alpha 1(I) chain of type I collagen. *J. Clin. Invest.* *89*,  
1057 567–573.
- 1058 72. Denny, J.C., Ritchie, M.D., Basford, M.A., Pulley, J.M., Bastarache, L., Brown-  
1059 Gentry, K., Wang, D., Masys, D.R., Roden, D.M., and Crawford, D.C. (2010). PheWAS:  
1060 Demonstrating the feasibility of a phenome-wide scan to discover gene-disease  
1061 associations. *Bioinformatics* *26*, 1205–1210.
- 1062 73. Denny, J.C., Bastarache, L., Ritchie, M.D., Carroll, R.J., Zink, R., Mosley, J.D.,  
1063 Field, J.R., Pulley, J.M., Ramirez, A.H., Bowton, E., et al. (2013). Systematic  
1064 comparison of phenome-wide association study of electronic medical record data and  
1065 genome-wide association study data. *Nat. Biotechnol.* *31*, 1102–1110.
- 1066 74. Dey, R., Schmidt, E.M., Abecasis, G.R., and Lee, S. (2017). A fast and accurate  
1067 algorithm to test for binary phenotypes and its application to PheWAS. *bioRxiv*.

- 1068 75. Yang, J., Lee, S.H., Goddard, M.E., and Visscher, P.M. (2011). GCTA: a tool for  
1069 genome-wide complex trait analysis. *Am. J. Hum. Genet.* 88, 76–82.
- 1070 76. Wang, X. (2014). Firth logistic regression for rare variant association tests. *Front.*  
1071 *Genet.* 5, 187.
- 1072 77. Kebaish, K.M., Neubauer, P.R., Voros, G.D., Khoshnevisan, M.A., and Skolasky,  
1073 R.L. (2011). Scoliosis in adults aged forty years and older: prevalence and relationship  
1074 to age, race, and gender. *Spine (Phila. Pa. 1976).* 36, 731–736.
- 1075 78. Reginster, J.Y. (2002). The prevalence and burden of arthritis. *Rheumatology*  
1076 (Oxford). 41 *Supp 1*, 3–6.
- 1077 79. Kolonel, L.N., Henderson, B.E., Hankin, J.H., Nomura, A.M., Wilkens, L.R., Pike,  
1078 M.C., Stram, D.O., Monroe, K.R., Earle, M.E., and Nagamine, F.S. (2000). A multiethnic  
1079 cohort in Hawaii and Los Angeles: baseline characteristics. *Am. J. Epidemiol.* 151, 346–  
1080 357.
- 1081 80. LaVange, L.M., Kalsbeek, W.D., Sorlie, P.D., Avilés-Santa, L.M., Kaplan, R.C.,  
1082 Barnhart, J., Liu, K., Giachello, A., Lee, D.J., Ryan, J., et al. (2010). Sample Design and  
1083 Cohort Selection in the Hispanic Community Health Study/Study of Latinos. *Ann.*  
1084 *Epidemiol.* 20, 642–649.
- 1085 81. (1998). Design of the Women’s Health Initiative clinical trial and observational study.  
1086 The Women’s Health Initiative Study Group. *Control. Clin. Trials* 19, 61–109.
- 1087 82. Cann, H.M., de Toma, C., Cazes, L., Legrand, M.-F., Morel, V., Piouffre, L., Bodmer,  
1088 J., Bodmer, W.F., Bonne-Tamir, B., Cambon-Thomsen, A., et al. (2002). A human  
1089 genome diversity cell line panel. *Science* 296, 261–262.
- 1090 83. Lek, M., Karczewski, K.J., Samocha, K.E., Banks, E., Fennell, T., O, A.H., Ware,  
1091 J.S., Hill, A.J., Cummings, B.B., Birnbaum, D.P., et al. (2016). Analysis of protein-coding  
1092 genetic variation in 60,706 humans. *bioRxiv* 536, 030338.
- 1093 84. Maples, B.K., Gravel, S., Kenny, E.E., and Bustamante, C.D. (2013). RFMix: A  
1094 discriminative modeling approach for rapid and robust local-ancestry inference. *Am. J.*  
1095 *Hum. Genet.* 93, 278–288.
- 1096 85. Browning, S.R., and Browning, B.L. (2015). Accurate Non-parametric Estimation of  
1097 Recent Effective Population Size from Segments of Identity by Descent. *Am. J. Hum.*  
1098 *Genet.* 97, 404–418.
- 1099 86. Gravel, S., Zakharia, F., Moreno-Estrada, A., Byrnes, J.K., Muzzio, M., Rodriguez-  
1100 Flores, J.L., Kenny, E.E., Gignoux, C.R., Maples, B.K., Guiblet, W., et al. (2013).  
1101 Reconstructing Native American migrations from whole-genome and whole-exome data.  
1102 *PLoS Genet.* 9, e1004023.

- 1103 87. Voight, B.F., Kudaravalli, S., Wen, X., and Pritchard, J.K. (2006). A map of recent  
1104 positive selection in the human genome. *PLoS Biol.* 4, e72.
- 1105 88. Szpiech, Z.A., and Hernandez, R.D. (2014). Selscan: An efficient multithreaded  
1106 program to perform EHH-based scans for positive selection. *Mol. Biol. Evol.* 31, 2824–  
1107 2827.
- 1108 89. Anikster, Y., Huizing, M., White, J., Shevchenko, Y.O., Fitzpatrick, D.L., Touchman,  
1109 J.W., Compton, J.G., Bale, S.J., Swank, R.T., Gahl, W. a, et al. (2001). Mutation of a  
1110 new gene causes a unique form of Hermansky-Pudlak syndrome in a genetic isolate of  
1111 central Puerto Rico. *Nat. Genet.* 28, 376–380.
- 1112 90. Cornier, A.S., Staehling-Hampton, K., Delventhal, K.M., Saga, Y., Caubet, J.-F.,  
1113 Sasaki, N., Ellard, S., Young, E., Ramirez, N., Carlo, S.E., et al. (2008). Mutations in the  
1114 *MESP2* Gene Cause Spondylothoracic Dysostosis/Jarcho-Levin Syndrome. *Am. J.*  
1115 *Hum. Genet.* 82, 1334–1341.
- 1116 91. Daniels, M.L.A., Leigh, M.W., Davis, S.D., Armstrong, M.C., Carson, J.L., Hazucha,  
1117 M., Dell, S.D., Eriksson, M., Collins, F.S., Knowles, M.R., et al. (2013). Founder  
1118 mutation in *RSPH4A* identified in patients of Hispanic descent with primary ciliary  
1119 dyskinesia. *Hum. Mutat.* 34, 1352–1356.
- 1120 92. Al-Zaidy, S.A., Malik, V., Kneile, K., Rosales, X.Q., Gomez, A.M., Lewis, S.,  
1121 Hashimoto, S., Gastier-Foster, J., Kang, P., Darras, B., et al. (2015). A slowly  
1122 progressive form of limb-girdle muscular dystrophy type 2C associated with founder  
1123 mutation in the *SGCG* gene in Puerto Rican Hispanics. *Mol. Genet. Genomic Med.* 3,  
1124 92–98.
- 1125 93. Arnold, S.E., Vega, I.E., Karlawish, J.H., Wolk, D.A., Nunez, J., Negron, M., Xie,  
1126 S.X., Wang, L.S., Dubroff, J.G., McCarty-Wood, E., et al. (2013). Frequency and  
1127 clinicopathological characteristics of presenilin 1 Gly206Ala mutation in puerto rican  
1128 hispanics with dementia. *J. Alzheimer's Dis.* 33, 1089–1095.
- 1129 94. Lee, J.H., Kahn, A., Cheng, R., Reitz, C., Vardarajan, B., Lantigua, R., Medrano, M.,  
1130 Jiménez-Velázquez, I.Z., Williamson, J., Nagy, P., et al. (2014). Disease-related  
1131 mutations among Caribbean Hispanics with familial dementia. *Mol. Genet. Genomic*  
1132 *Med.* 2, 430–437.
- 1133 95. Kotabagi, S., Shah, H., Shukla, A., and Girisha, K.M. (2017). Second family  
1134 provides further evidence for causation of Steel syndrome by biallelic mutations in  
1135 *COL27A1*. *Clin. Genet.*
- 1136 96. Gariballa, N., Ben-Mahmoud, A., Komara, M., Al-Shamsi, A.M., John, A., Ali, B.R.,  
1137 and Al-Gazali, L. (2017). A novel aberrant splice site mutation in *COL27A1* is  
1138 responsible for Steel syndrome and extension of the phenotype to include hearing loss.  
1139 *Am. J. Med. Genet. Part A* 173, 1257–1263.

- 1140 97. Humes, K.R., Jones, N. a., and Ramirez, R.R. (2011). Overview of race and  
1141 hispanic origin: 2010. Office 23.
- 1142 98. Henn, B.M., Hon, L., Macpherson, J.M., Eriksson, N., Saxonov, S., Pe'er, I., and  
1143 Mountain, J.L. (2012). Cryptic distant relatives are common in both isolated and  
1144 cosmopolitan genetic samples. *PLoS One* 7,.
- 1145 99. Alexander, D.H., Novembre, J., and Lange, K. (2009). Fast model-based estimation  
1146 of ancestry in unrelated individuals. *Genome Res.* 19, 1655–1664.
- 1147 100. Roshyara, N.R., and Scholz, M. (2014). fcGENE: A Versatile Tool for Processing  
1148 and Transforming SNP Datasets. *PLoS One* 9, e97589.
- 1149 101. Gusev, A., Kenny, E.E., Lowe, J.K., Salit, J., Saxena, R., Kathiresan, S., Altshuler,  
1150 D.M., Friedman, J.M., Breslow, J.L., and Pe'er, I. (2011). DASH: a method for identical-  
1151 by-descent haplotype mapping uncovers association with recent variation. *Am. J. Hum.*  
1152 *Genet.* 88, 706–717.
- 1153 102. Delaneau, O., Marchini, J., and Zagury, J.-F. (2011). A linear complexity phasing  
1154 method for thousands of genomes. *Nat. Methods* 9, 179–181.
- 1155 103. O'Connell, J., Gurdasani, D., Delaneau, O., Pirastu, N., Ulivi, S., Cocca, M.,  
1156 Traglia, M., Huang, J., Huffman, J.E., Rudan, I., et al. (2014). A general approach for  
1157 haplotype phasing across the full spectrum of relatedness. *PLoS Genet.* 10, e1004234.
- 1158 104. Howie, B.N., Donnelly, P., and Marchini, J. (2009). A flexible and accurate  
1159 genotype imputation method for the next generation of genome-wide association  
1160 studies. *PLoS Genet.* 5, e1000529.
- 1161 105. Linderman, M.D., Brandt, T., Edelmann, L., Jabado, O., Kasai, Y., Kornreich, R.,  
1162 Mahajan, M., Shah, H., Kasarskis, A., and Schadt, E.E. (2014). Analytical validation of  
1163 whole exome and whole genome sequencing for clinical applications. *BMC Med.*  
1164 *Genomics* 7, 20.
- 1165 106. Laurie, C.C., Doheny, K.F., Mirel, D.B., Pugh, E.W., Bierut, L.J., Bhangale, T.,  
1166 Boehm, F., Caporaso, N.E., Cornelis, M.C., Edenberg, H.J., et al. (2010). Quality control  
1167 and quality assurance in genotypic data for genome-wide association studies. *Genet.*  
1168 *Epidemiol.* 34, 591–602.

1169

1170 |



1171 **Web Resources**

1172 *BioMe OmniExpress data:*

1173 [https://www.ncbi.nlm.nih.gov/projects/gap/cgi-bin/study.cgi?study\\_id=phs000888.v1.p1](https://www.ncbi.nlm.nih.gov/projects/gap/cgi-bin/study.cgi?study_id=phs000888.v1.p1)

1174 *BioMe MEGA data:*

1175 [https://www.ncbi.nlm.nih.gov/projects/gap/cgi-bin/study.cgi?study\\_id=phs000925](https://www.ncbi.nlm.nih.gov/projects/gap/cgi-bin/study.cgi?study_id=phs000925)

1176 *PAGE MEGA data:*

1177 [https://www.ncbi.nlm.nih.gov/projects/gap/cgi-bin/study.cgi?study\\_id=phs000356](https://www.ncbi.nlm.nih.gov/projects/gap/cgi-bin/study.cgi?study_id=phs000356)

1178 *Location of Native American panels:*

1179 [ftp://ftp.1000genomes.ebi.ac.uk/vol1/ftp/technical/working/20130711\\_native\\_ame  
1180 rican\\_admix\\_train/](ftp://ftp.1000genomes.ebi.ac.uk/vol1/ftp/technical/working/20130711_native_american_admix_train/)

1181 *Software used in the analysis:*

1182 SMARTPCA: <https://github.com/DReichLab/EIG>

1183 ADMIXTURE: <https://www.genetics.ucla.edu/software/admixture/download.html>

1184 RelateAdmix: <http://www.popgen.dk/software/index.php/RelateAdmix#Download>

1185 RFMix: <https://sites.google.com/site/rfmixlocalancestryinference/>

1186 GERMLINE: <http://www.cs.columbia.edu/~gusev/germline/>

1187 DASH: <http://www1.cs.columbia.edu/~gusev/dash/>

1188 PyMol: [www.pymol.org](http://www.pymol.org)

1189 [IBDNe: http://faculty.washington.edu/browning/ibdne.html](http://faculty.washington.edu/browning/ibdne.html)

| <b>EHR-Documented Evidence</b>        | <b>Literature<br/>Homozygous<br/>children</b> | <b>Literature<br/>Homozygous<br/>Adults</b> | <b>BioMe<br/>Homozygous<br/>Adults</b> | <b>BioMe<br/>Heterozygous<br/>Adults &lt;55yoa</b> | <b>BioMe<br/>Controls<br/>Adults &lt;55yoa</b> |
|---------------------------------------|-----------------------------------------------|---------------------------------------------|----------------------------------------|----------------------------------------------------|------------------------------------------------|
| N (N of females)                      | 27 (9)                                        | 7(6)                                        | 5 (3)                                  | 34(20)                                             | 31(23)                                         |
| Mean age (years)                      | 12.8                                          | 35.4                                        | 51.6                                   | 41.8                                               | 40.6                                           |
| <b>EHR-Documented Medical History</b> | <b>N(%)</b>                                   | <b>N(%)</b>                                 | <b>N(%)</b>                            | <b>N(%)</b>                                        | <b>N(%)</b>                                    |
| Height >= 2 s.d. from pop mean        | 27 (100)                                      | 7 (100)                                     | 5 (100)                                | 0 (0)                                              | 0 (0)                                          |
| Congenital hip dislocation            |                                               |                                             | 4                                      | 0                                                  | 0                                              |
| Leg length discrepancy                |                                               |                                             | 1                                      | 0                                                  | 0                                              |
| <b>Total</b>                          | <b>27(100)</b>                                | <b>7(100)</b>                               | <b>5 (100)</b>                         | <b>0 (0)</b>                                       | <b>0 (0)</b>                                   |
| Elbow contractures                    | 24 (89)                                       | 7 (100)                                     | 1 (20)                                 | 0 (0)                                              | 0 (0)                                          |
| Wrist deformity                       |                                               |                                             | 1                                      | 2                                                  | 1                                              |
| Lunotriquetral fusion                 |                                               |                                             | 1                                      | 0                                                  | 0                                              |
| Carpel tunnel                         |                                               |                                             | 0                                      | 3                                                  | 3                                              |
| <b>Total</b>                          | <b>24 (89)</b>                                | <b>6 (86)</b>                               | <b>2 (40)</b>                          | <b>5(15)</b>                                       | <b>4(13)</b>                                   |
| Scoliosis                             | 12 (44)                                       | 6 (86)                                      | 2 (40)                                 | 8 (24)                                             | 4 (13)                                         |
| Pes cavus                             | 12 (44)                                       | 0 (0)                                       | 0 (0)                                  | 0 (0)                                              | 0 (0)                                          |
| Cervical stenosis                     |                                               |                                             | 3                                      | 5                                                  | 0                                              |
| Cervical discitis                     |                                               |                                             | 1                                      | 0                                                  | 0                                              |
| Cervical spondylosis                  |                                               |                                             | 2                                      | 7                                                  | 3                                              |
| Cervical cord compression             |                                               |                                             | 3                                      | 3                                                  | 1                                              |
| <b>Total</b>                          | <b>3 (9)</b>                                  | <b>0 (0)</b>                                | <b>4 (80)</b>                          | <b>7 (21)</b>                                      | <b>3 (10)</b>                                  |
| <b>EHR-Documented Medical History</b> |                                               |                                             | <b>N(%)</b>                            | <b>N(%)</b>                                        | <b>N(%)</b>                                    |
| Lumbar spine                          | -                                             | -                                           | 1 (20)                                 | 10 (29)                                            | 5 (16)                                         |
| Thoracic spine                        | -                                             | -                                           | 1 (20)                                 | 5(15)                                              | 4(13)                                          |
| Osteoporosis or osteopenia            | -                                             | -                                           | 3 (60)                                 | 3(9)                                               | 1 (3)                                          |
| Arthritis or degenerative changes     | -                                             | -                                           | 3 (60)                                 | 13(38)                                             | 6 (19)                                         |
| Hip replacement                       | -                                             | -                                           | 3 (60)                                 | 0 (0)                                              | 0 (0)                                          |
| Knee replacement                      | -                                             | -                                           | 2 (40)                                 | 0 (0)                                              | 0 (0)                                          |
| Cervical spine                        | -                                             | -                                           | 3 (60)                                 | 2 (6)                                              | 1 (3)                                          |
| Lumbar spine                          | -                                             | -                                           | 1 (20)                                 | 1 (3)                                              | 0 (0)                                          |
| Thoracic spine                        | -                                             | -                                           | 2 (40)                                 | 1 (3)                                              | 1 (3)                                          |

1190

1191

1192 **Table 1** Clinical characteristics of five BioMe participants homozygote, thirty-four  
 1193 carriers and thirty-one non-carriers of the *COL27A1.pG697R* variant using evidence  
 1194 documented in Electronic Health Records (including billing and procedural codes,  
 1195 laboratory, radiologic, and progress notes) compared to features previously reported in  
 1196 Flynn et al, 2010, and Steel et al, 1993 for 27 children and 7 adults with Steel  
 1197 syndrome.

1198

1199

| Disease Category | ICD9 Code | Short description                                          | Number of diagnoses among carriers<br>N (%) | Number of diagnoses among non-carriers<br>N (%) | Odds Ratio<br>(5% confidence intervals) | P-value                |
|------------------|-----------|------------------------------------------------------------|---------------------------------------------|-------------------------------------------------|-----------------------------------------|------------------------|
| Neoplasms        | 622.10    | Dysplasia of cervix, not otherwise specified               | 6 (5.7)                                     | 62 (1.4)                                        | 5.4 (2.3-12.6)                          | 1.0 x 10 <sup>-4</sup> |
| Musculoskeletal  | 716.98    | Arthropathy unspecified, involving other unspecified sites | 4 (3.8)                                     | 48 (1.1)                                        | 5.8 (2.2-15.3)                          | 4.4 x 10 <sup>-4</sup> |
| Musculoskeletal  | 721.00    | Cervical spondylosis without myelopathy                    | 5 (4.5)                                     | 74 (1.6)                                        | 5.4 (2.4-12.3)                          | 6.6 x 10 <sup>-5</sup> |
| Musculoskeletal  | 730.08    | Acute osteomyelitis involving other specified sites        | 3 (2.8)                                     | 6 (0.1)                                         | 34.5 (7.4-162)                          | 7.1 x 10 <sup>-6</sup> |
| Digestive        | 789.10    | Hepatomegaly                                               | 3 (2.8)                                     | 17 (0.4)                                        | 11.6 (3.2-42.2)                         | 2.1 x 10 <sup>-4</sup> |

1200

1201 **Table 2** Top five significantly PheWAS associated ICD9 codes in *COL27A1.pG697R*  
 1202 carriers (N=106) compared to non-carriers (N=4480)

1203

1204 |

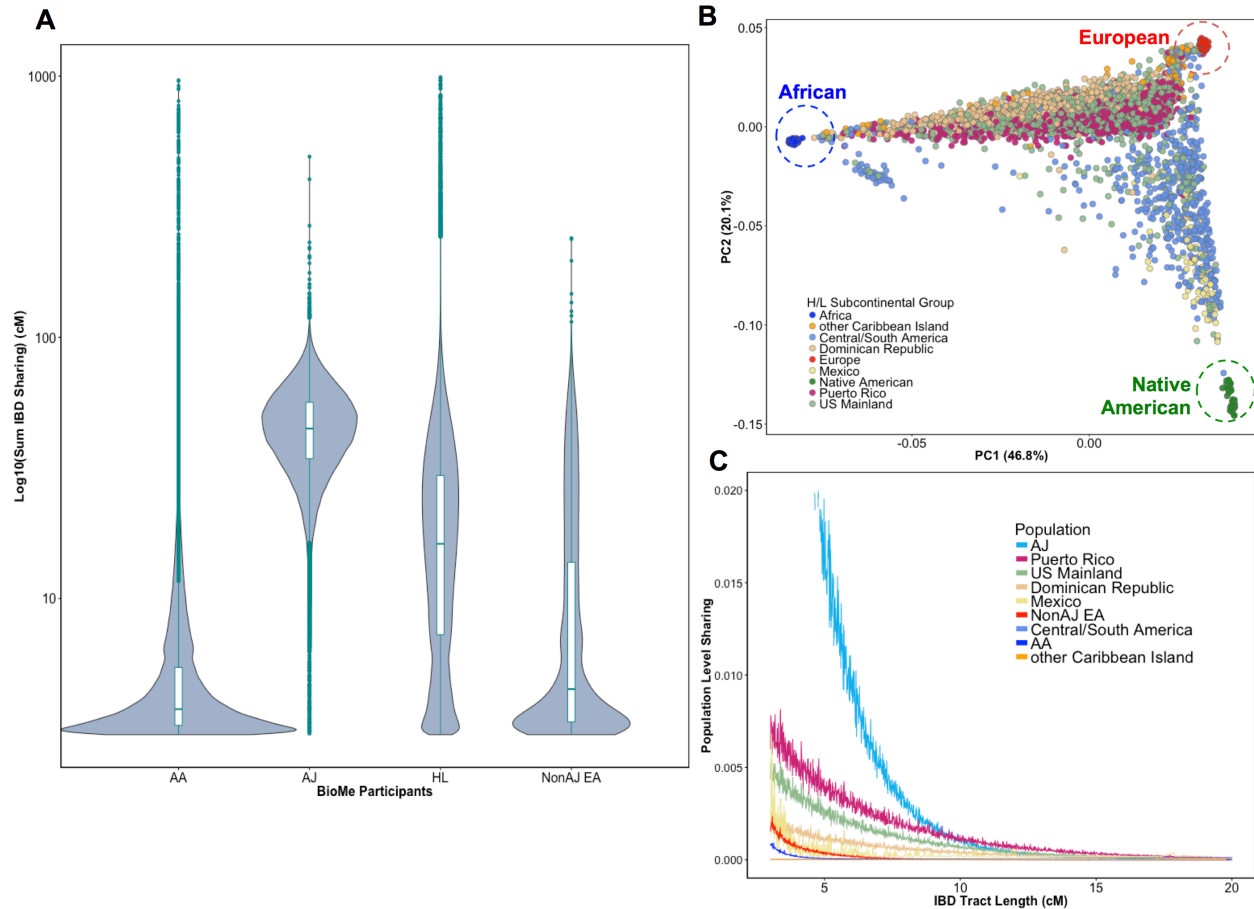

1205  
1206 **Figure 1** (A) Distribution of the pairwise sum of Identity-by-Descent (IBD) sharing (cM)  
1207 between four broadly defined BioMe populations, namely; African American (AA),  
1208 Ashkenazi Jewish (AJ), Hispanic/Latino (H/L) and Non-Jewish European American  
1209 (Non-AJ EA). (B) Sub-continental diversity in self-reported H/L participants in BioMe.  
1210 Afro-Caribbean participants fall between European (red) and African (blue) continental  
1211 reference panels, Mexican and Central/South American H/L participants fall between  
1212 European and Native American (green) reference panels, mainland US-born  
1213 participants reside on either cline. (C) The tract length distribution of IBD sharing among  
1214 BioMe populations, normalized by population size. The y-axis represents the proportion  
1215 population-level sharing ( $x / (N*(N-1)/2)$ ), where x is the sum of the number of pairwise

1216 shared IBD tracts and  $N$  is the number of individuals per population. The AJ population  
1217 exhibits the highest level of population level sharing, followed by Puerto Rican born H/L.  
1218 |

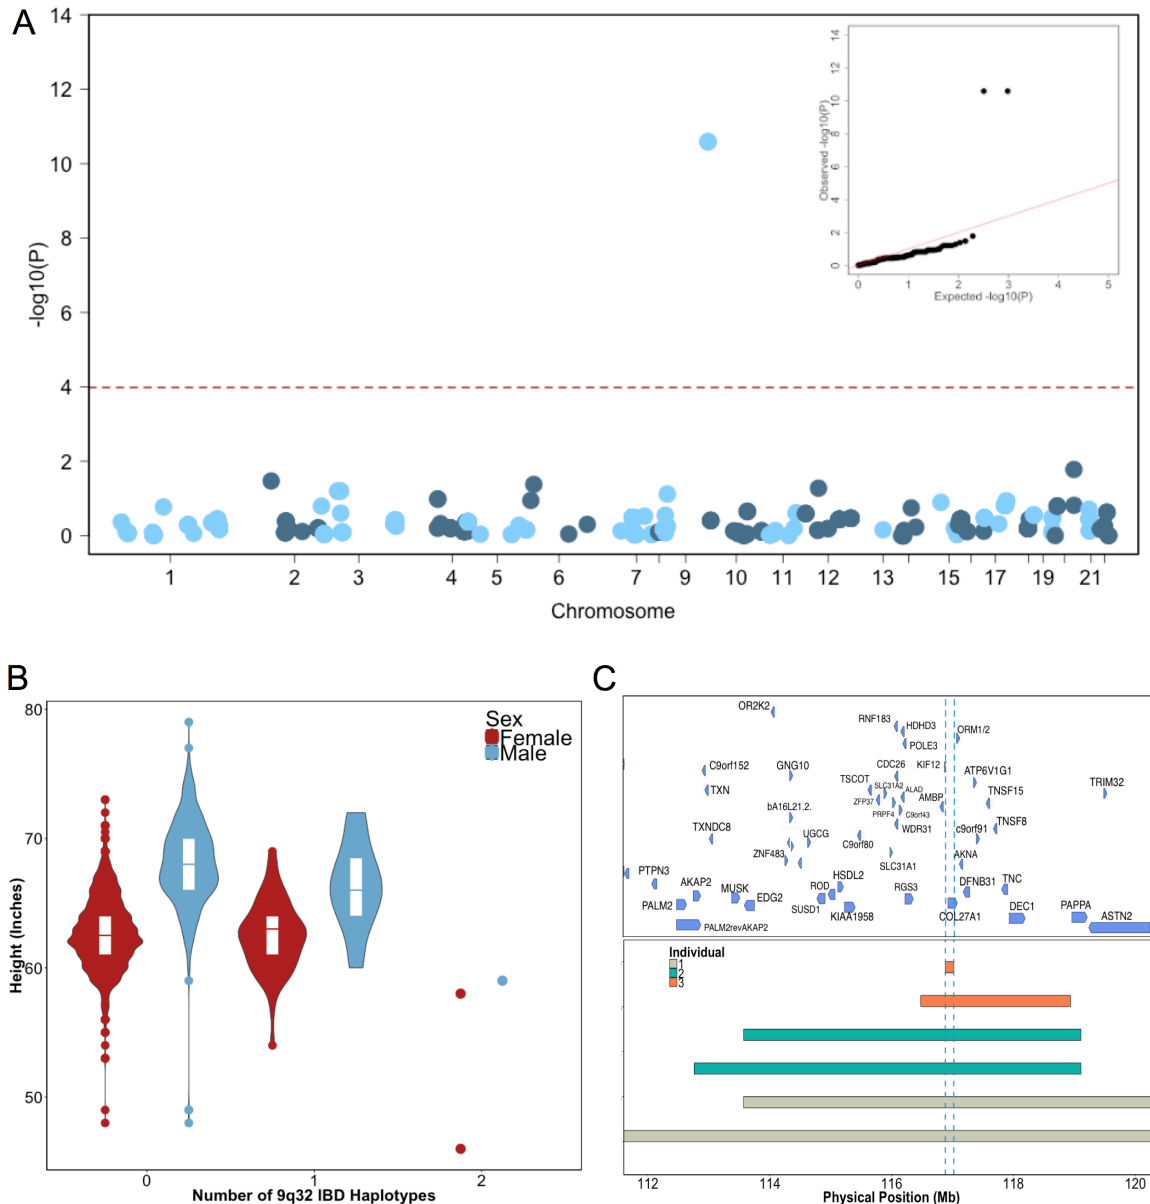

1219  
 1220 **Figure 2** (A) Identity-By-Descent (IBD) mapping for height in BioMe Puerto Ricans  
 1221 using a recessive model. Analysis was restricted to IBD-cliques where at least three  
 1222 individuals were homozygous. Only one IBD-clique achieved Bonferonni significance (at  
 1223 9q32). (B) Distribution of height among Puerto Rican individuals who carry either 0,1 or  
 1224 2 copies of the IBD-haplotype reveals a large recessive effect. Homozygous individuals  
 1225 (those carrying 2 copies of the IBD-haplotype) are on average 6-10” shorter than the  
 1226 population mean for Puerto Rican ancestry individuals. (C) The minimum shared

1227 boundary of the significant IBD-haplotype between the three homozygous individuals  
1228 (represented by the dashed blue line). The top panel depicts known genes at the 9q32  
1229 locus. The minimum shared boundary of the IBD overlaps the gene *COL2*

1230

1231 |

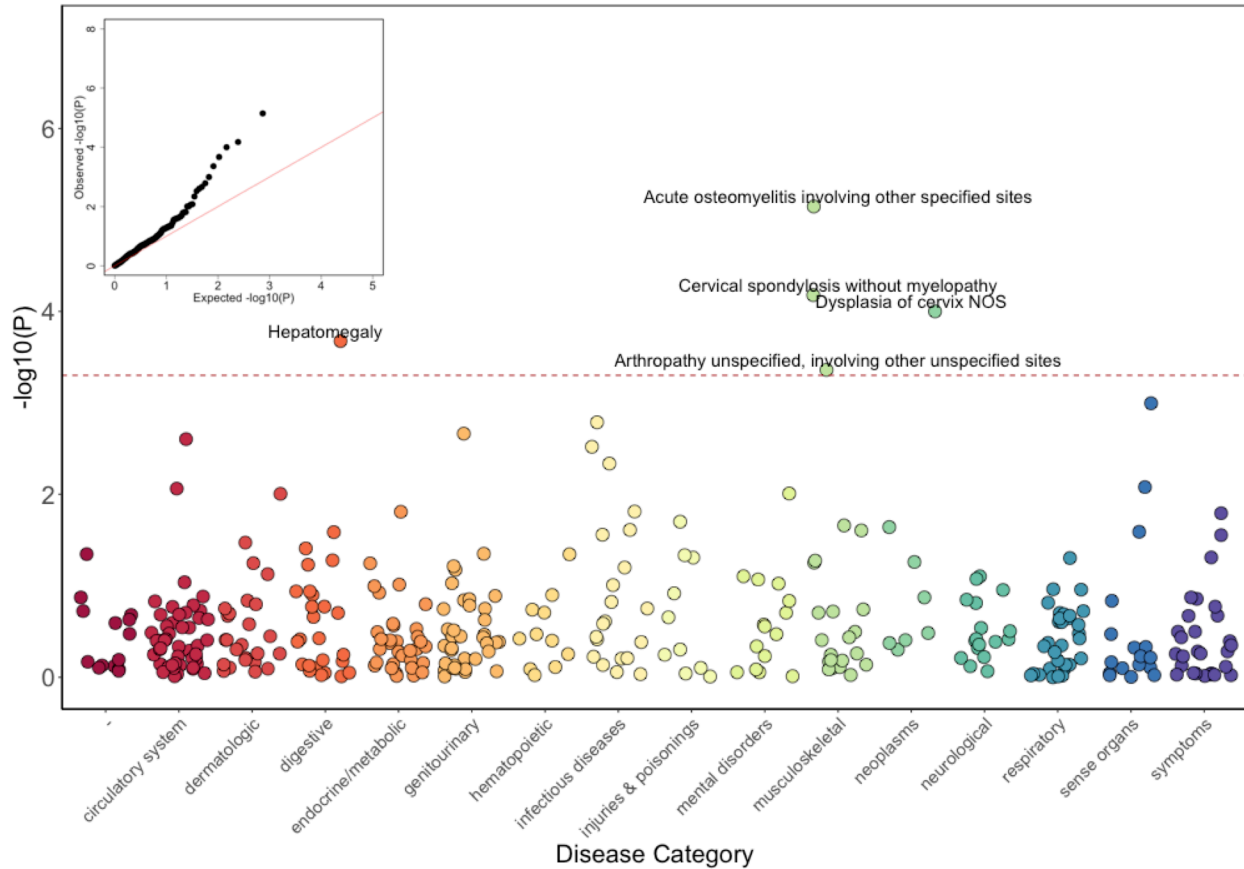

1232  
1233 **Figure 3** Phenome-Wide Association Study (PheWAS) of *COL27A1*.pG697R carriers vs  
1234 ICD9 billing codes derived from the Electronic Health Records (EHR) under a general  
1235 linear model (GLM). Five billing codes achieve significance (FDR adjusted  $p < 0.05$ ).  
1236 Three of the five significant ICD9 codes are in category of musculoskeletal disorders.

1237

1238 |



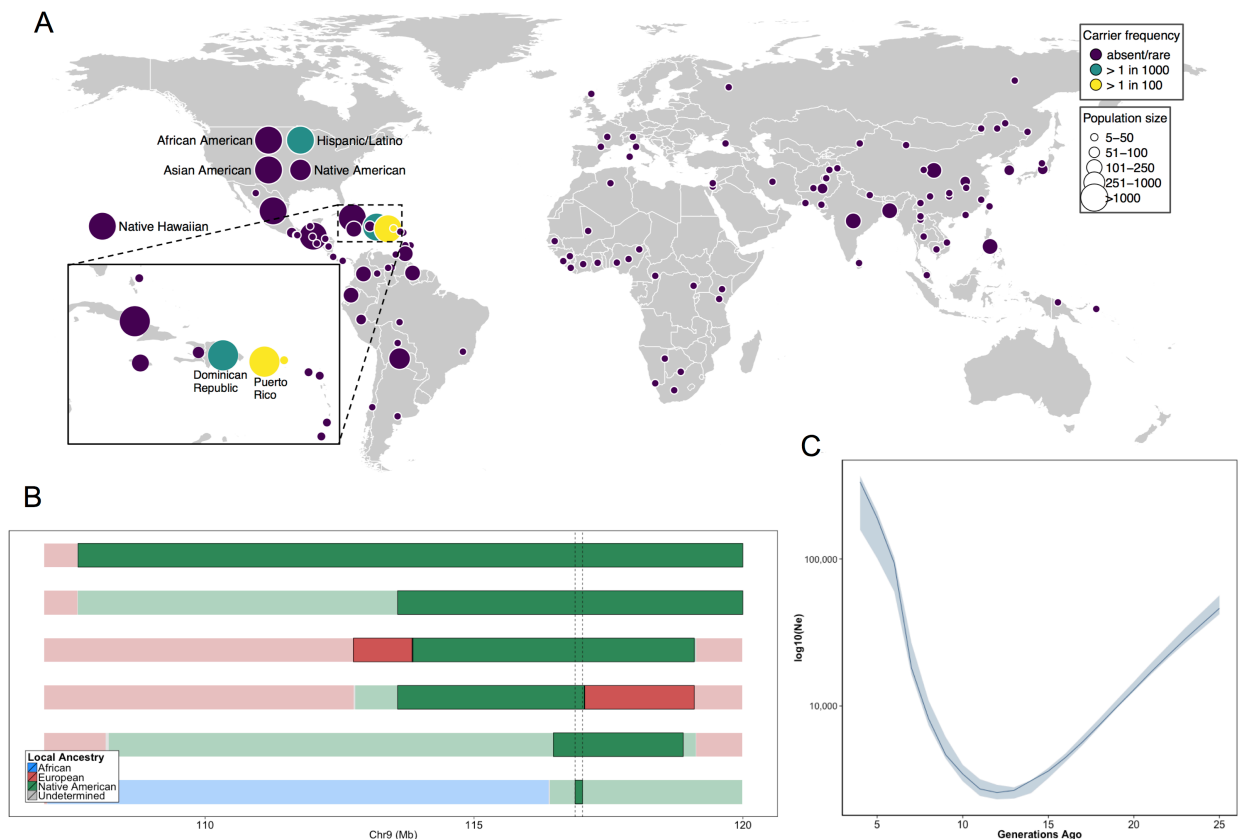

1239  
 1240 **Figure 4.** (A) Global carrier frequency of *COL27A1*.pG697R in a multi-ethnic database  
 1241 of over 57,000 individuals representing 112 populations. The variant is absent or very  
 1242 rare in most populations (purple), at 1:746 and 1:346 carrier frequency amongst  
 1243 individuals from the Dominican Republic and Hispanic/Latino's in the United States  
 1244 (green), and at 1:51 and 1:9 carrier frequency amongst individuals from Puerto Rico and  
 1245 St. Thomas (yellow). (B) Joint analysis of identity-by-descent and local ancestry  
 1246 haplotypes in three individuals homozygous for the *COL27A1*.pG697R variant. A large  
 1247 15cM interval on chromosome 9 is shown with local ancestry inferred as African (blue),  
 1248 European (red) and Native American (green), with shading to indicating the boundaries  
 1249 of the IBD haplotypes. The location of *COL27A1* is indicated by the dashed line (C)  
 1250 Effective population size of the Puerto Rican discovery population (N=2816) over the  
 1251 past 4-25 generations inferred from the tract length distribution of IBD haplotypes

1252 suggests that the ancestral population underwent a bottleneck approximately 9-14  
1253 generations ago. 95% confidence intervals are represented by blue ribbon  
1254
